# Supplementary material for: Antimicrobial Activity and DFT Studies of a Novel Set of Spiropyrrolidines Tethered with Thiochroman-4-one/Chroman-4-one Scaffolds
Source: MDPI journal article supplement (doi:10.3390/molecules27030582), 2022-01-18
Supplement: s1 [file s1]

# Antimicrobial Activity, *in silico* Molecular Docking and DFT Studies of Novel Set of Spiropyrrolidines Tethered with Thiochroman-4-one/Chroman-4-one Scaffolds

Nourhène Chouchène<sup>1</sup>, Amani Toumi<sup>1</sup>, Sarra Boudriga<sup>1,\*</sup>, Hayet Edziri<sup>2</sup>, Mansour Sobeh<sup>3</sup>, Mohamed A. O. Abdelfattah<sup>4</sup>, Moheddine Askri<sup>1</sup>, Michael Knorr<sup>5,\*</sup>, Carsten Strohm<sup>6</sup>, Lukas Brieger<sup>6</sup>, and Armand Soldera<sup>7,\*</sup>

<sup>1</sup> Laboratory of Heterocyclic Chemistry Natural Product and Reactivity (LR11ES39), Department of Chemistry, Faculty of Science of Monastir, 5019 Monastir, Tunisia; nourhene.chouchene23@gmail.com (N.C.); amanitoumi45@gmail.com (A.T.); sarra\_boudriga@yahoo.fr (S.B.); moheddine.askri@fsm.rnu.tn (M.A.)

<sup>2</sup> Laboratoire des maladies transmissibles et des substances biologiquement actives, Faculté de pharmacie, 5000 Monastir, Tunisia; jaziri\_hayet@yahoo.fr (H.E.)

<sup>3</sup> AgroBioSciences Research, Mohammed VI Polytechnic University, Lot 660-Hay Moulay Rachid, Ben-Guerir 43150, Morocco; mansour.sobeh@um6p.ma (M.S.)

<sup>4</sup> College of Engineering and Technology, American University of the Middle East, Kuwait; Mohamed.AbdelMoety@aum.edu.kw (M.O.M.)

<sup>5</sup> Institut UTINAM-UMR CNRS 6213, Université Bourgogne Franche-Comté, 16 Route de Gray, 25030 Besançon, France; michael.knorr@univ-fcomte.fr (M.K.)

<sup>6</sup> Technische Universität Dortmund, Anorganische Chemie, Otto-Hahn-Strasse 6, 44227 Dortmund, Germany; carsten.strohm@tu-dortmund.de (C.S.); lukas.brieger@tu-dortmund.de (L.B.)

<sup>7</sup> Department of Chemistry, Laboratory of Physical Chemistry of Matter, Université de Sherbrooke, Sherbrooke, Québec J1K 2R1, Canada; Email: armand.soldera@usherbrooke.ca (A.S.)

\*Correspondance: sarra\_boudriga@yahoo.fr (S.B.); michael.knorr@univ-fcomte.fr (M.K.); armand.soldera@usherbrooke.ca (A.S.)

## Supplementary Materials

### Table of contents

|                                                                                                                                                                   | Page  |
|-------------------------------------------------------------------------------------------------------------------------------------------------------------------|-------|
| 1. Copies of <sup>1</sup> H- and <sup>13</sup> C-NMR Spectra of compounds <b>4a-f</b> and <b>9a-h</b> (Fig. S1 to S30)                                            | 2-16  |
| 2. The chemical shifts $\delta$ [ppm] from the experimental and theoretical <sup>1</sup> H and <sup>13</sup> C NMR spectra of compounds <b>4a</b> and <b>9c</b> . | 17    |
| 3. Crystallographic data of <b>4a</b> , <b>4e</b> , and <b>9c</b> .                                                                                               | 17-19 |
| 4. DFT data                                                                                                                                                       | 20-41 |

1. Copies of  $^1\text{H}$ - and  $^{13}\text{C}$ -NMR Spectra of compounds 4a-f and 9a-h

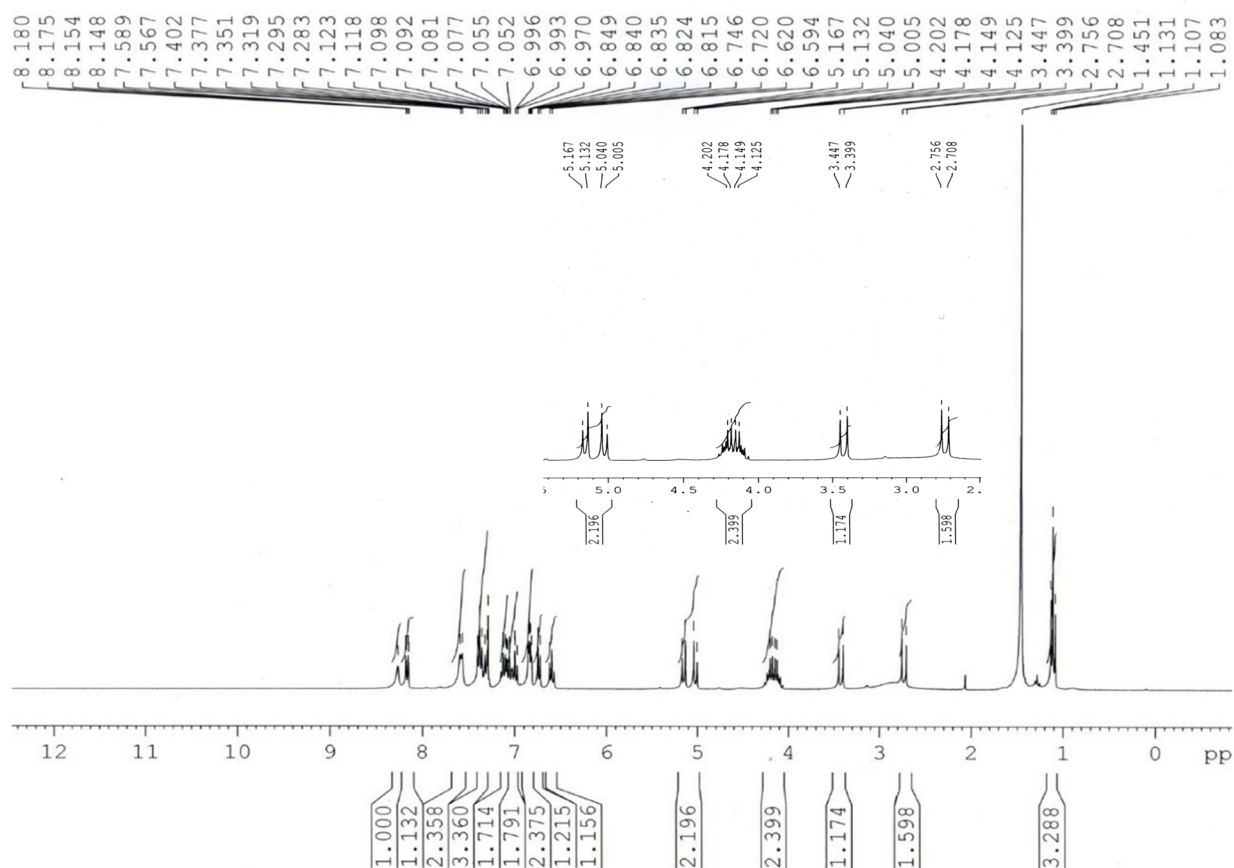

Figure S1.  $^1\text{H}$  NMR spectrum of compound 4a (300 MHz,  $\text{CDCl}_3$ )

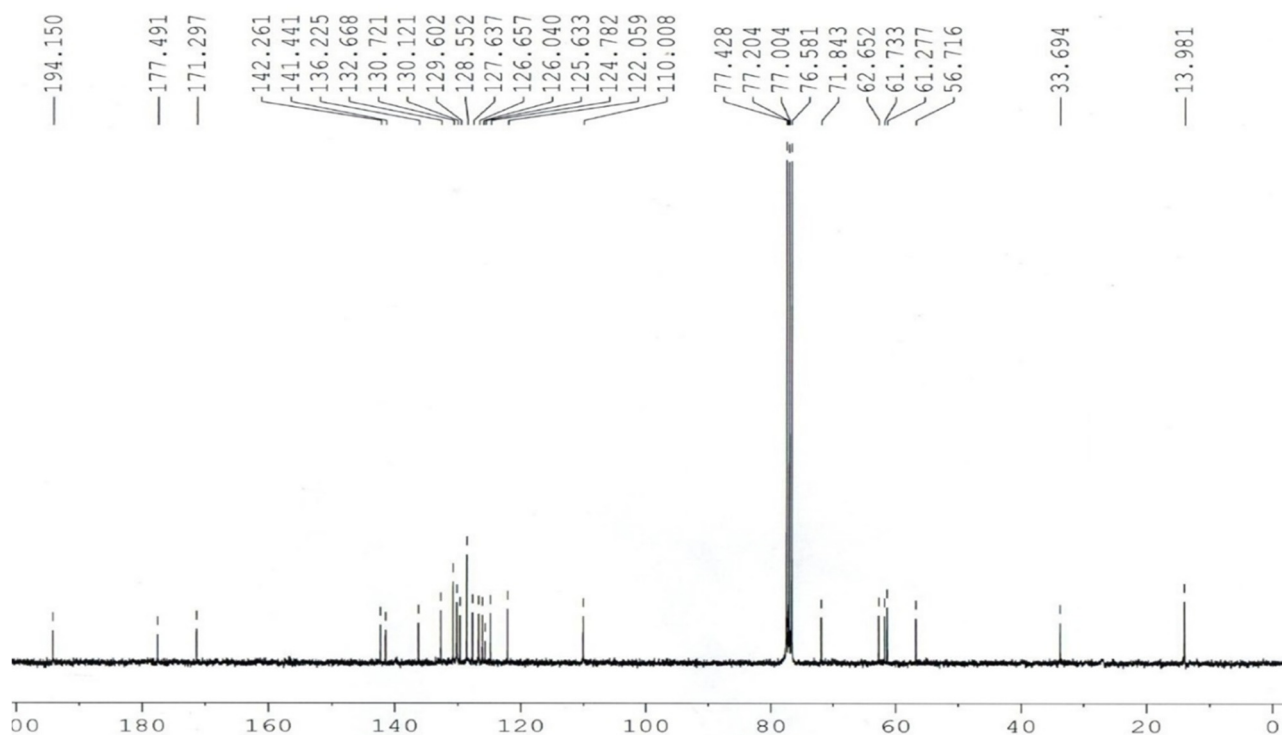

Figure S2.  $^{13}\text{C}$   $\{^1\text{H}\}$  NMR spectrum of compound 4a (75 MHz,  $\text{CDCl}_3$ )

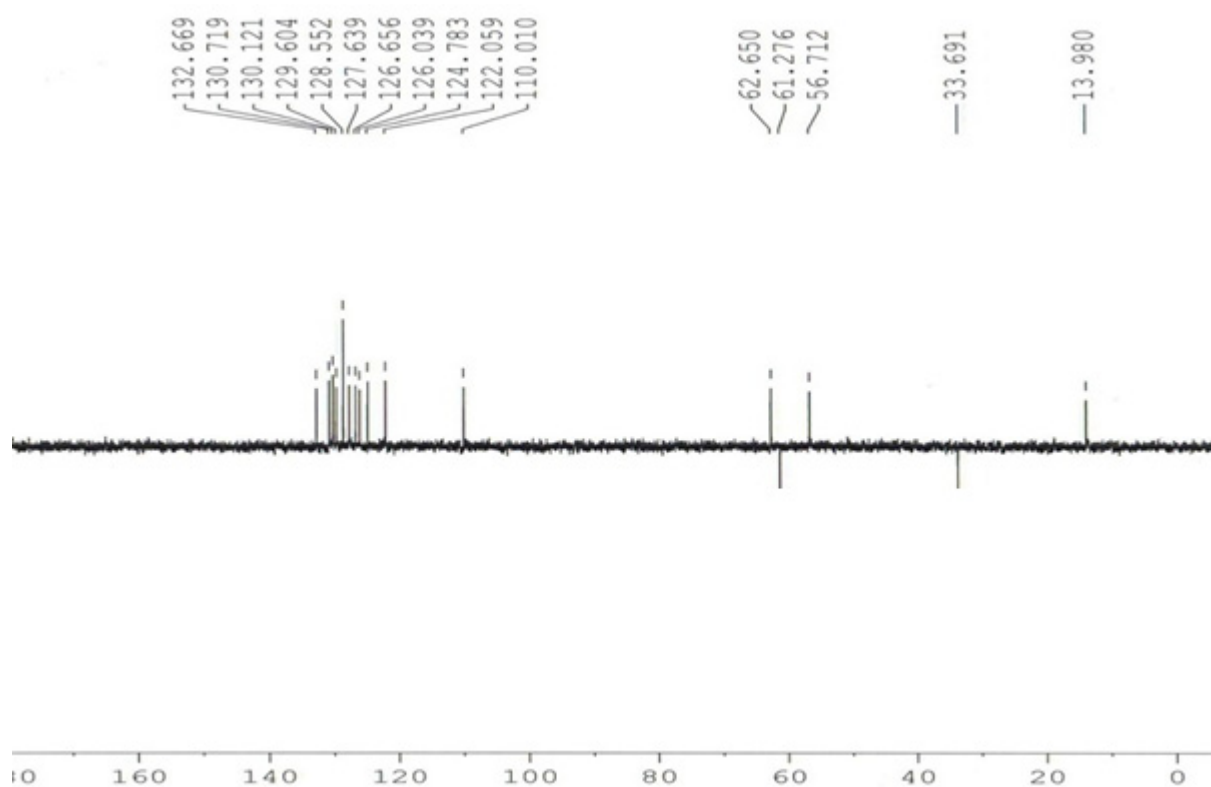

**Figure S3.** DEPT-135  $^{13}\text{C}$  NMR spectrum of compound **4a** (75 MHz,  $\text{CDCl}_3$ )

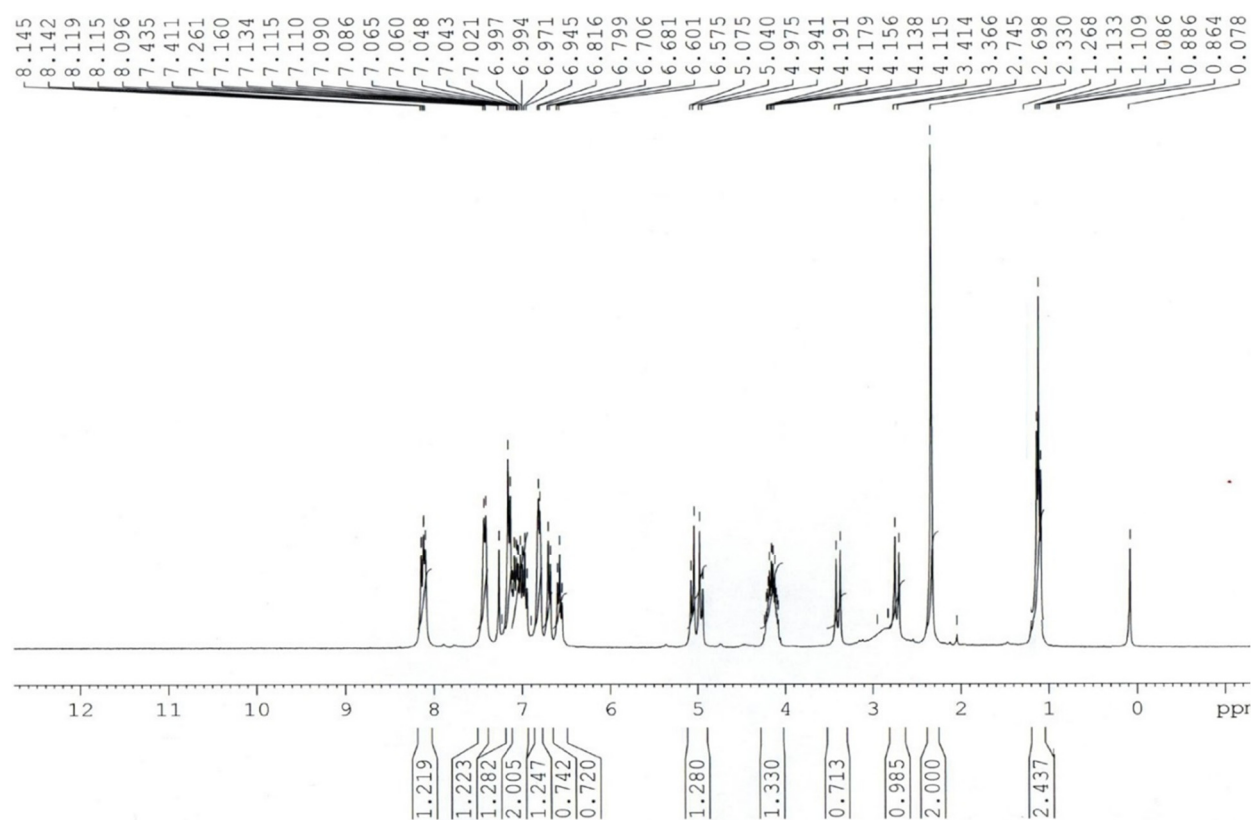

**Figure S4.**  $^1\text{H}$  NMR spectrum of compound **4b** (300 MHz,  $\text{CDCl}_3$ )

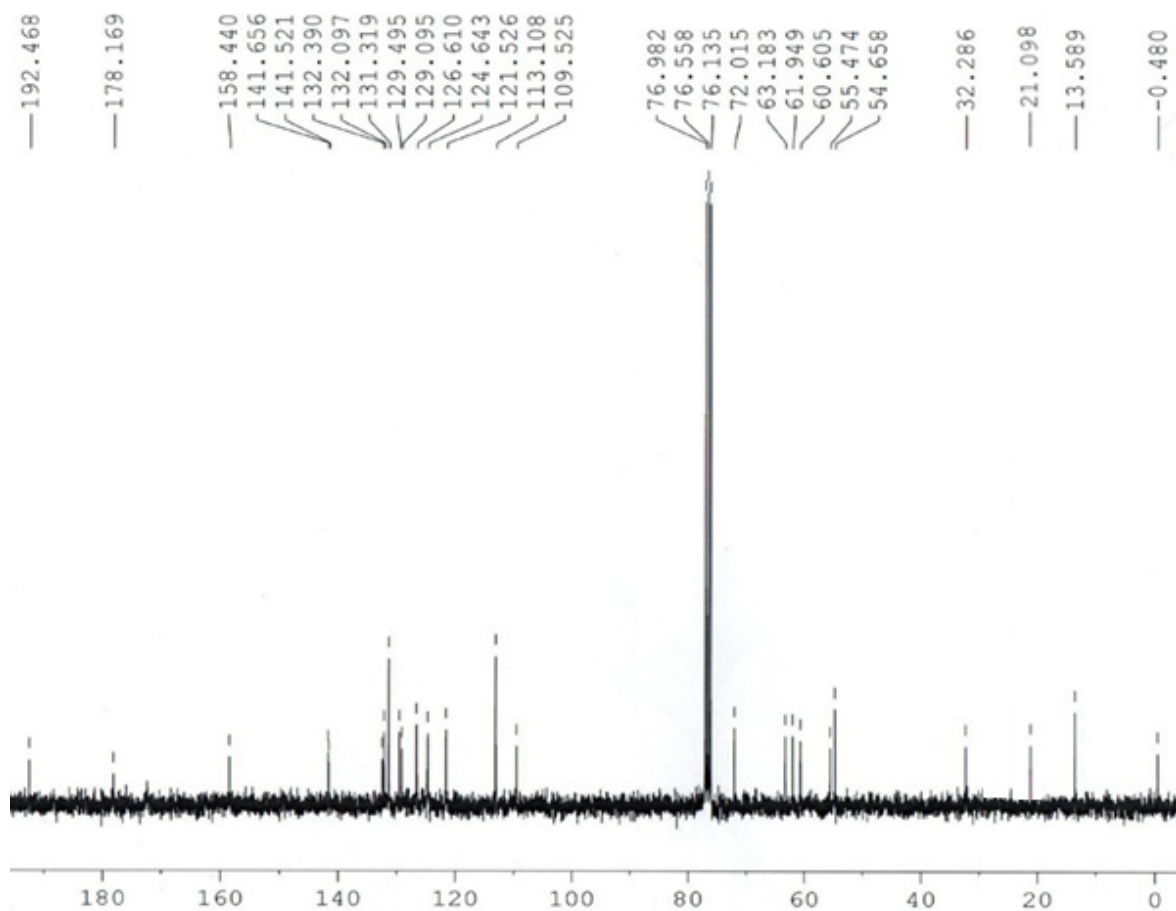

**Figure S5.**  $^{13}\text{C}$   $\{^1\text{H}\}$  NMR spectrum of compound **4b** (75 MHz,  $\text{CDCl}_3$ )

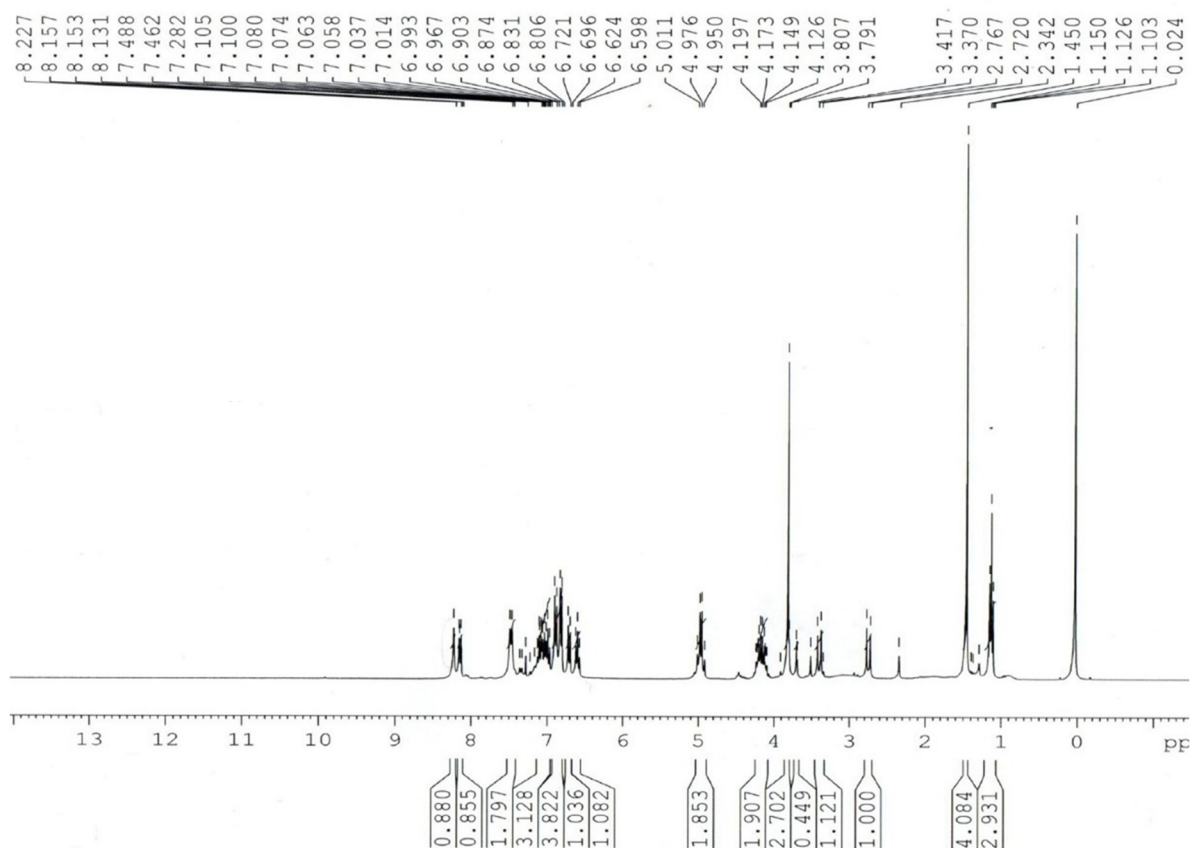

**Figure S6.**  $^1\text{H}$  NMR spectrum of compound **4c** (300 MHz,  $\text{CDCl}_3$ )



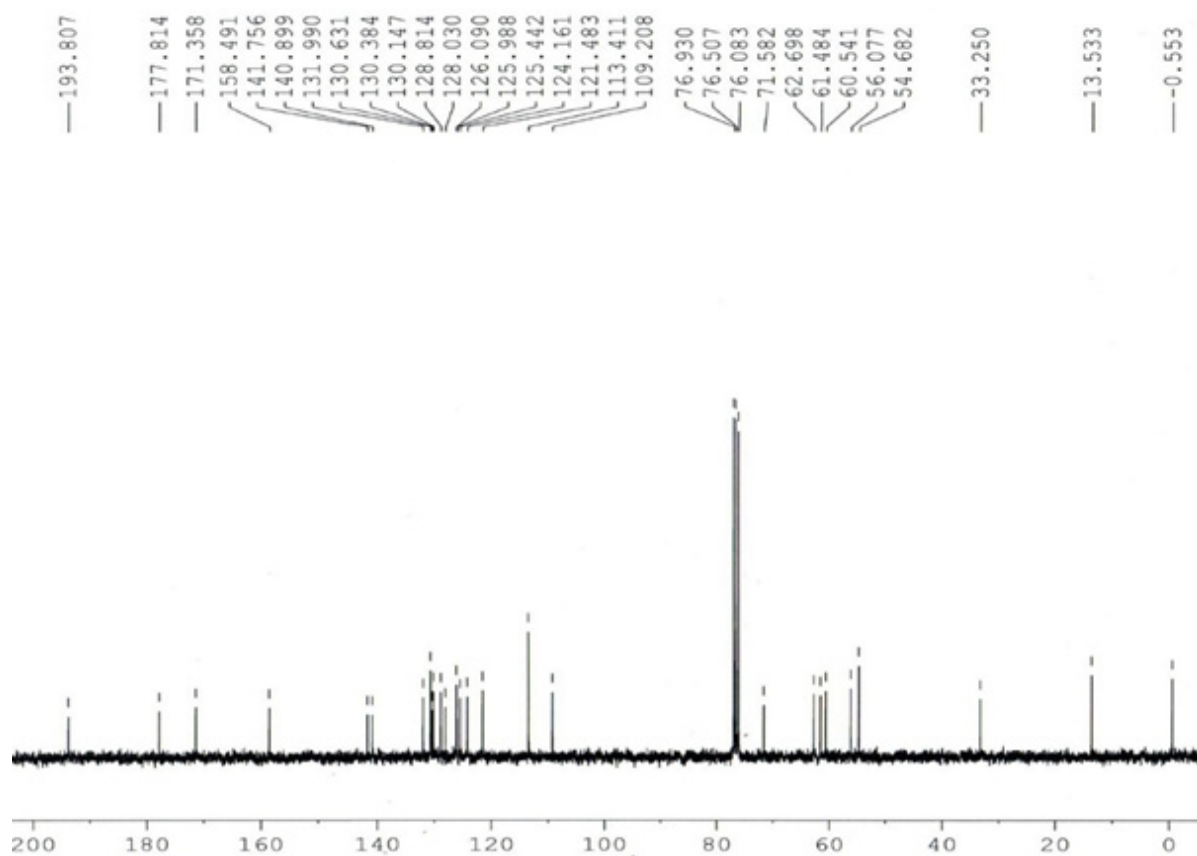

**Figure S7.**  $^{13}\text{C}$   $\{^1\text{H}\}$  NMR spectrum of compound **4c** (75 MHz,  $\text{CDCl}_3$ )

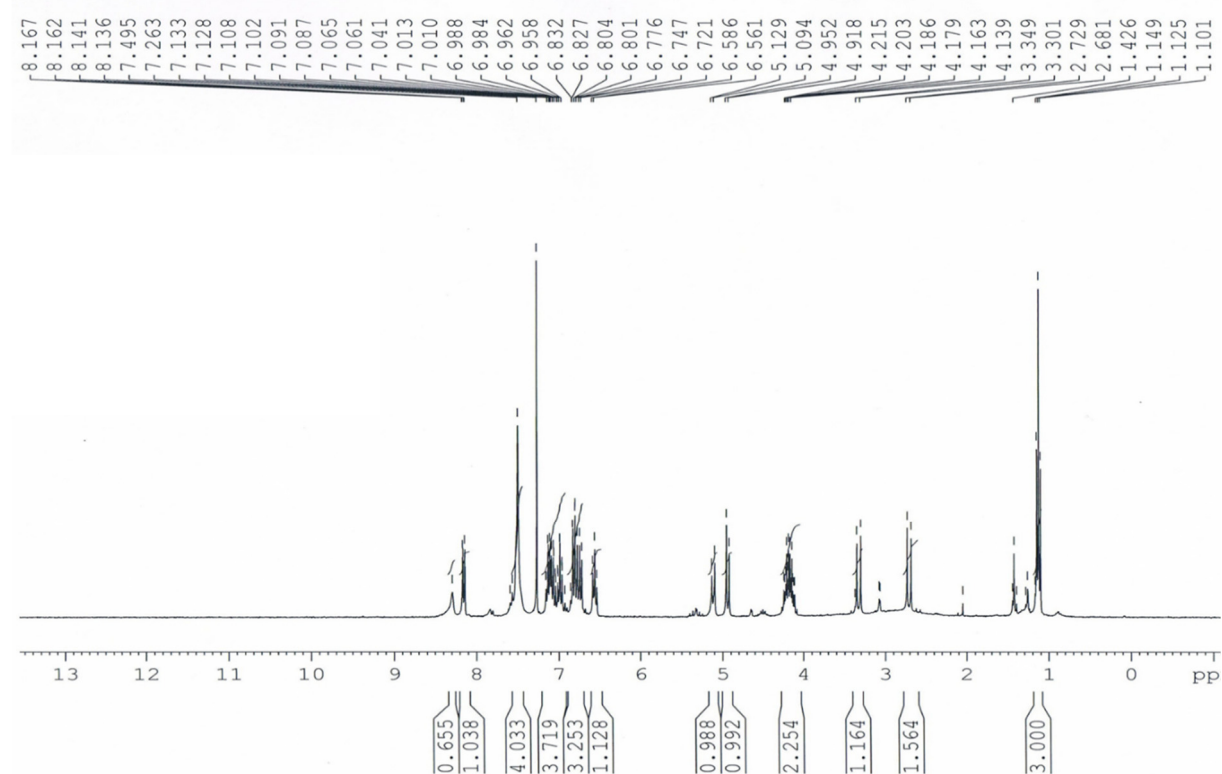

**Figure S8.**  $^1\text{H}$  NMR spectrum of compound **4d** (300 MHz,  $\text{CDCl}_3$ )

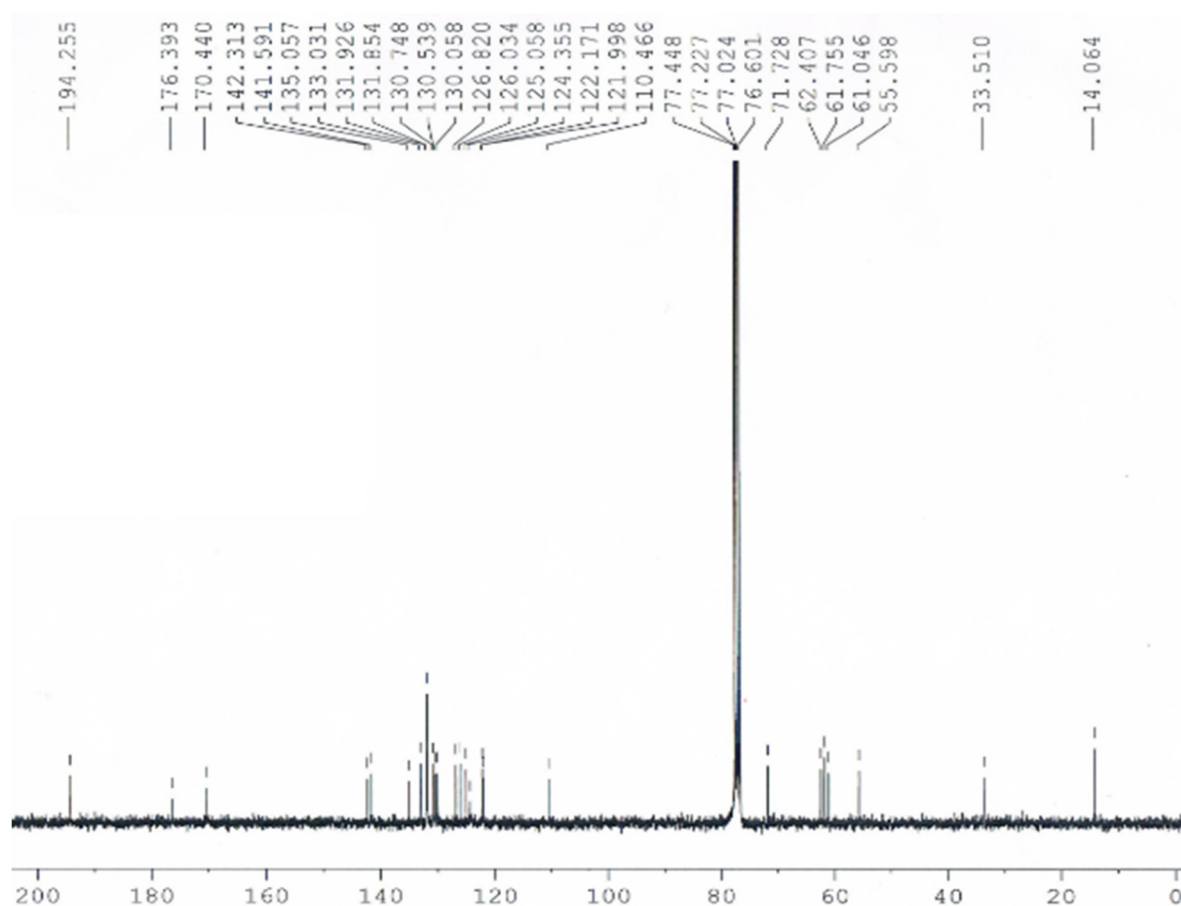

**Figure S9.**  $^{13}\text{C}$   $\{^1\text{H}\}$  NMR spectrum of compound **4d** (75 MHz,  $\text{CDCl}_3$ )

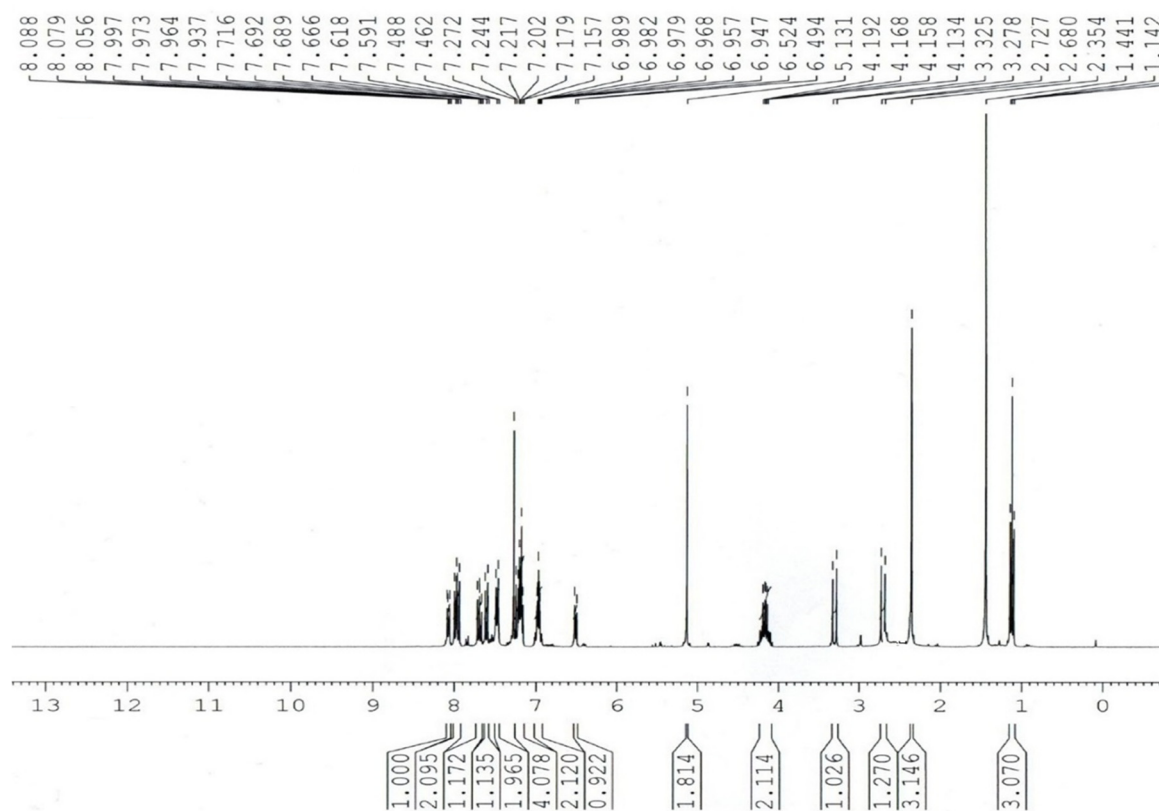

**Figure S10.**  $^1\text{H}$  NMR spectrum of compound **4e** (300 MHz,  $\text{CDCl}_3$ )

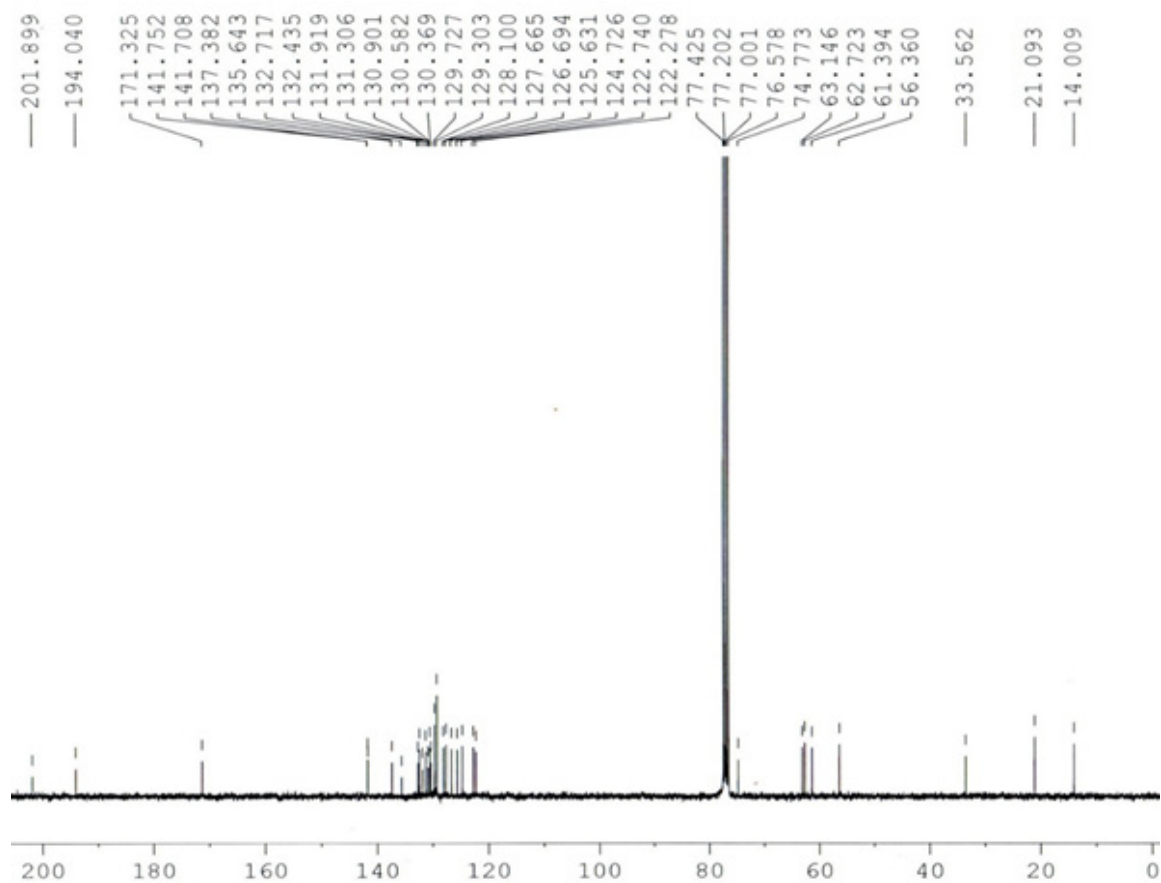

**Figure S11.**  $^{13}\text{C}$  [ $^1\text{H}$ ] NMR spectrum of compound **4e** (75 MHz,  $\text{CDCl}_3$ )

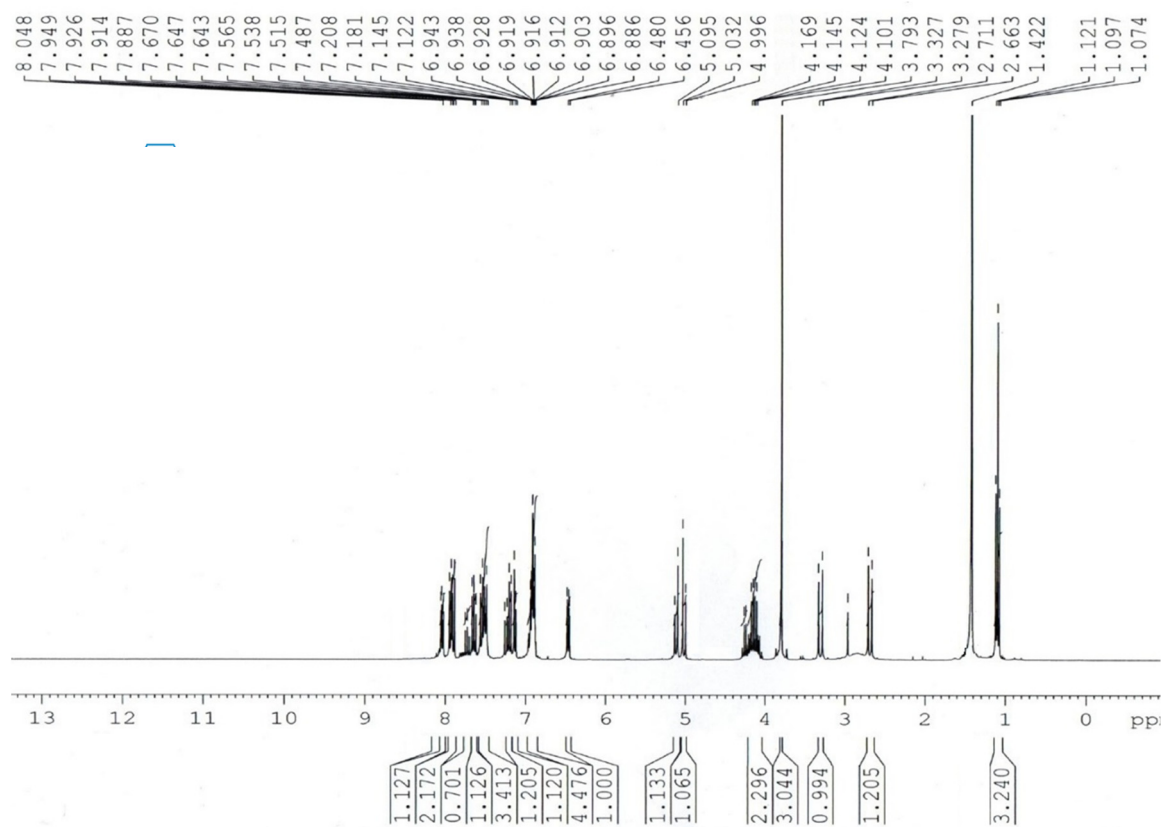

**Figure S12.**  $^1\text{H}$  NMR spectrum of compound **4f** (300 MHz,  $\text{CDCl}_3$ )

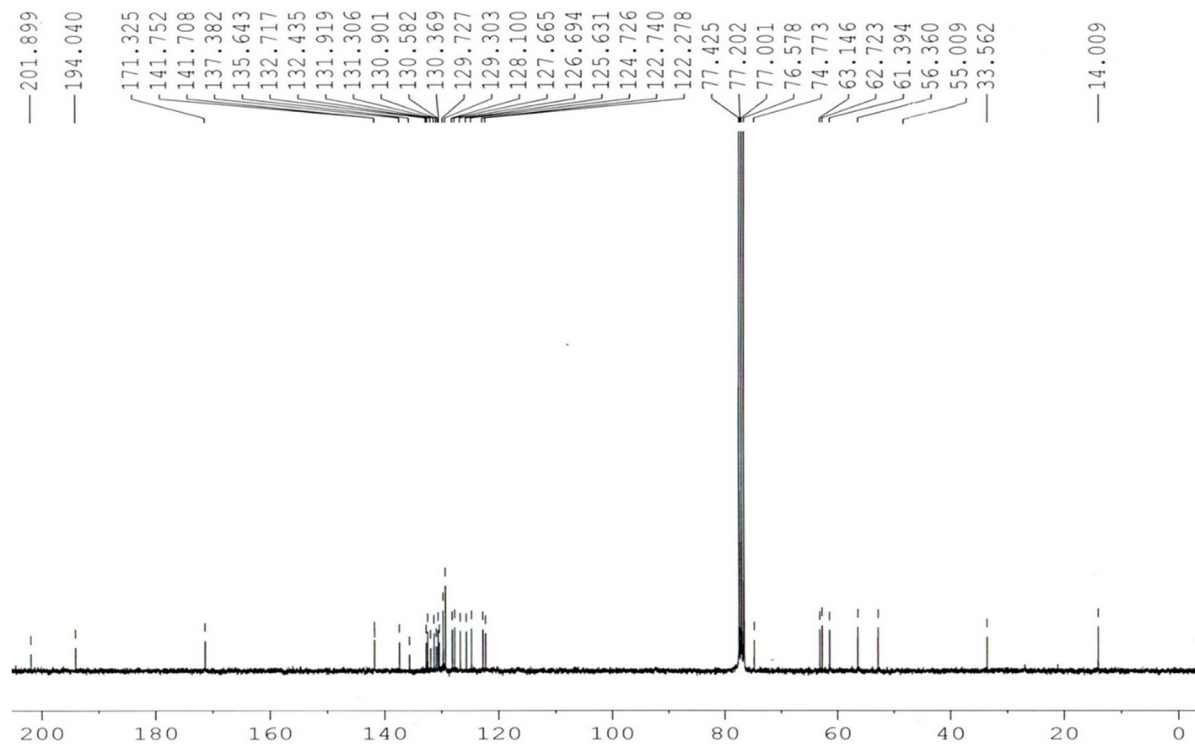

**Figure S13.**  $^{13}\text{C}$  ( $^1\text{H}$ ) NMR spectrum of compound **4f** (75 MHz,  $\text{CDCl}_3$ )

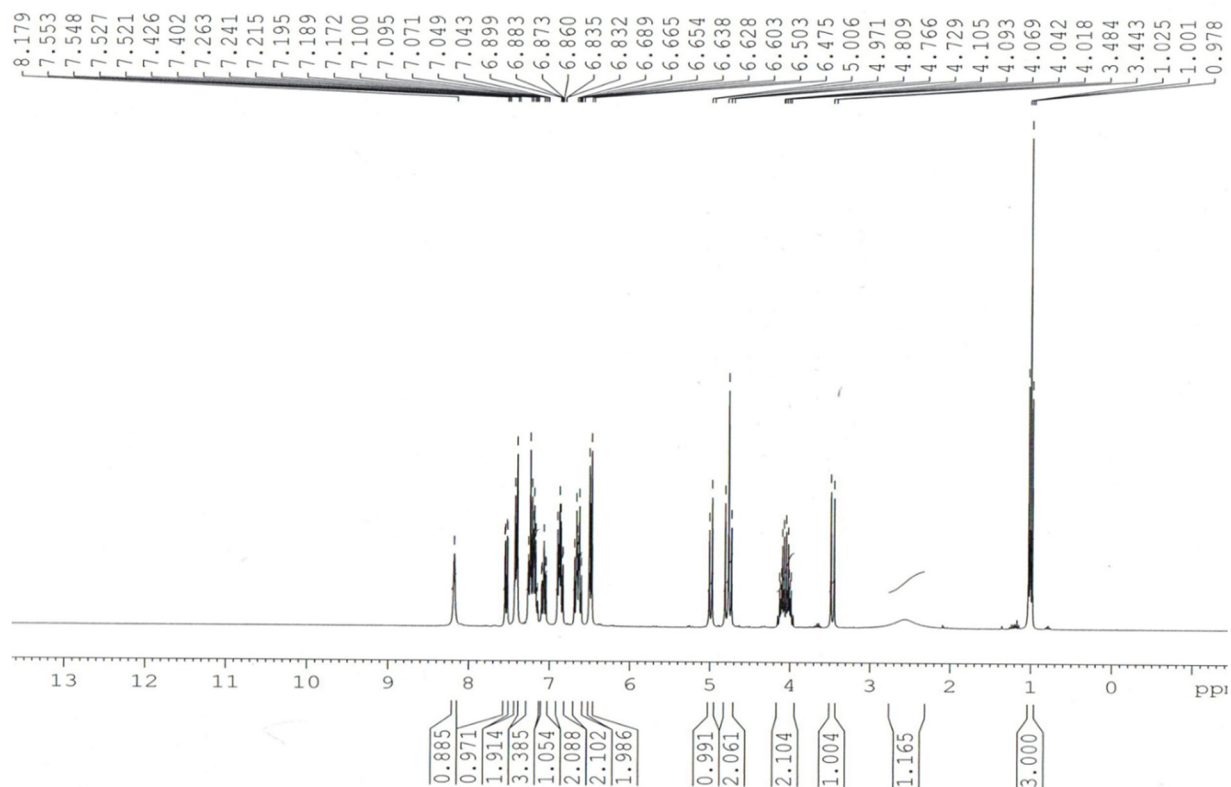

**Figure S14.**  $^1\text{H}$  NMR spectrum of compound **9a** (300 MHz,  $\text{CDCl}_3$ )

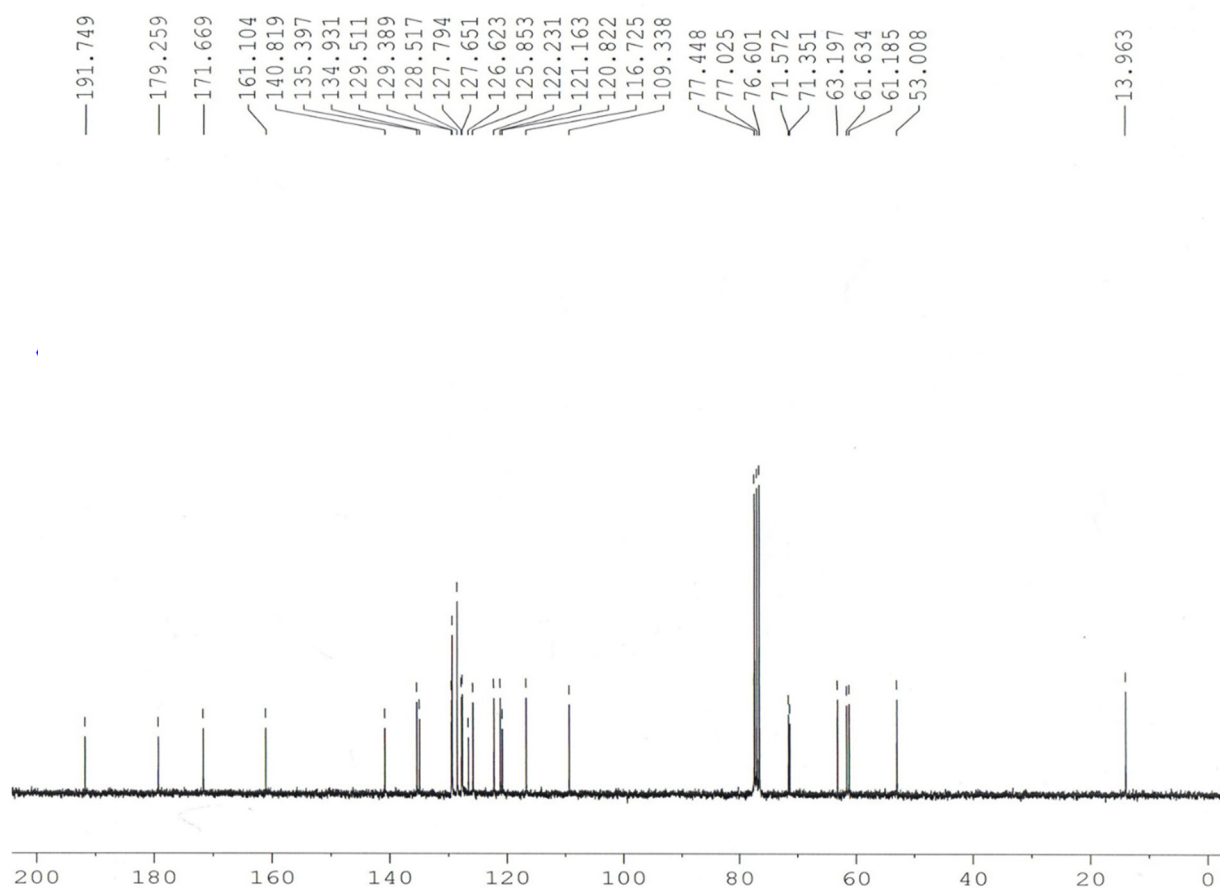

**Figure S15.**  $^{13}\text{C}$  [ $^1\text{H}$ ] NMR spectrum of compound **9a** (75 MHz,  $\text{CDCl}_3$ )

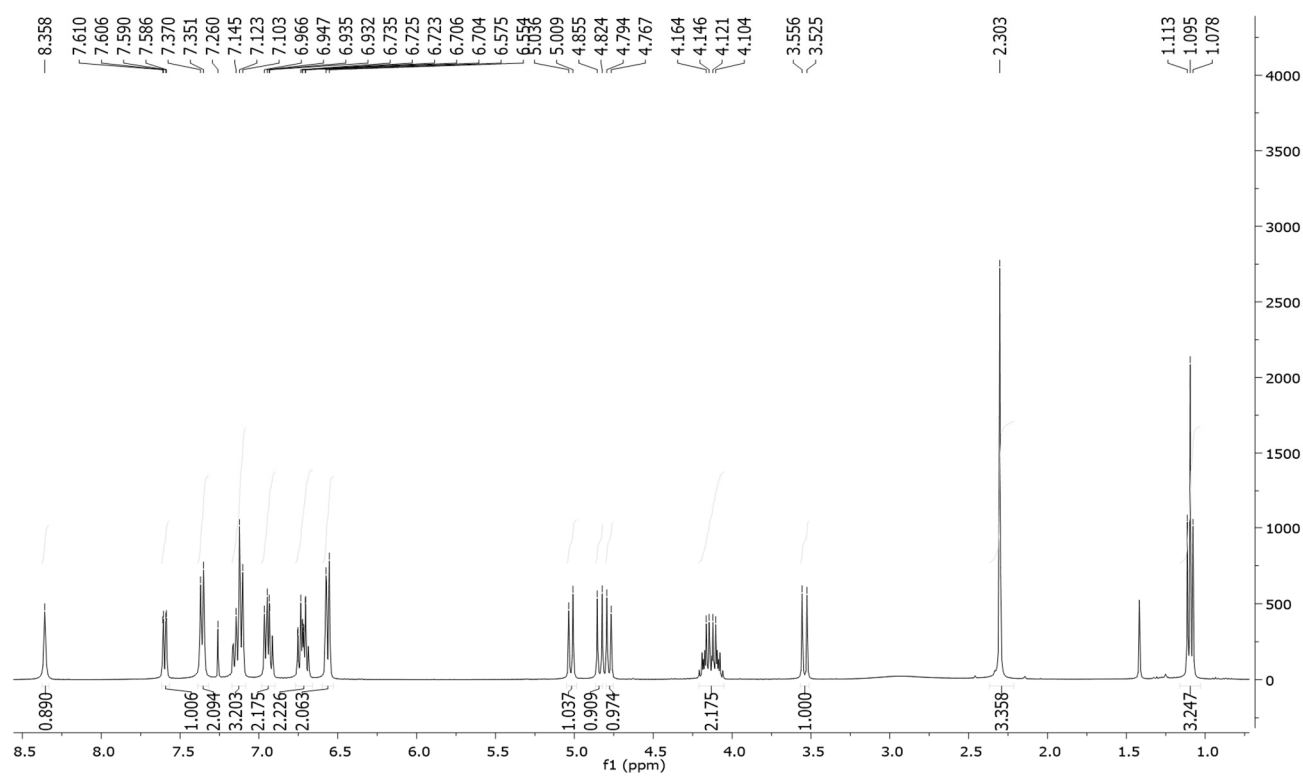

**Figure S16.**  $^1\text{H}$  NMR spectrum of compound **9b** (400 MHz,  $\text{CDCl}_3$ )

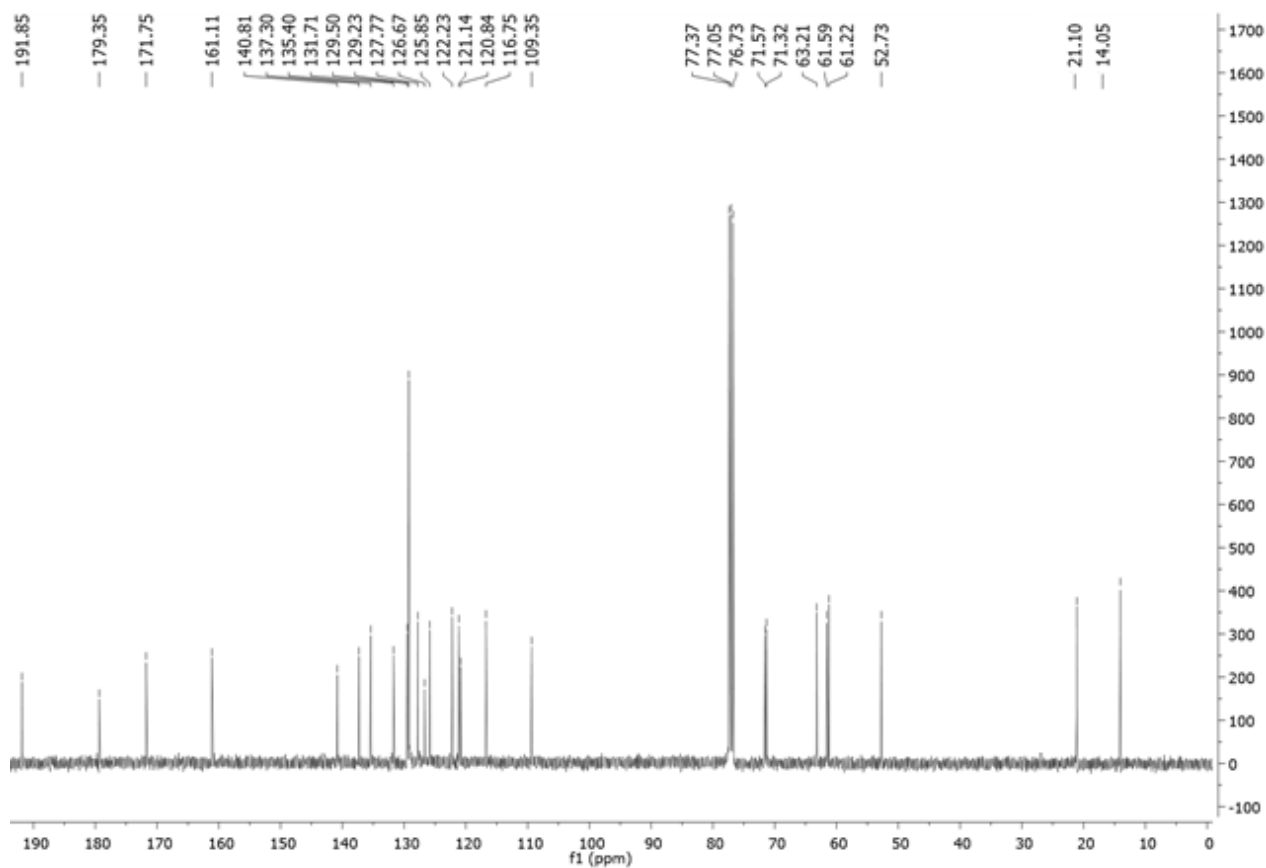

**Figure S17.**  $^{13}\text{C}$  ( $^1\text{H}$ ) NMR spectrum of compound **9b** (100 MHz,  $\text{CDCl}_3$ )

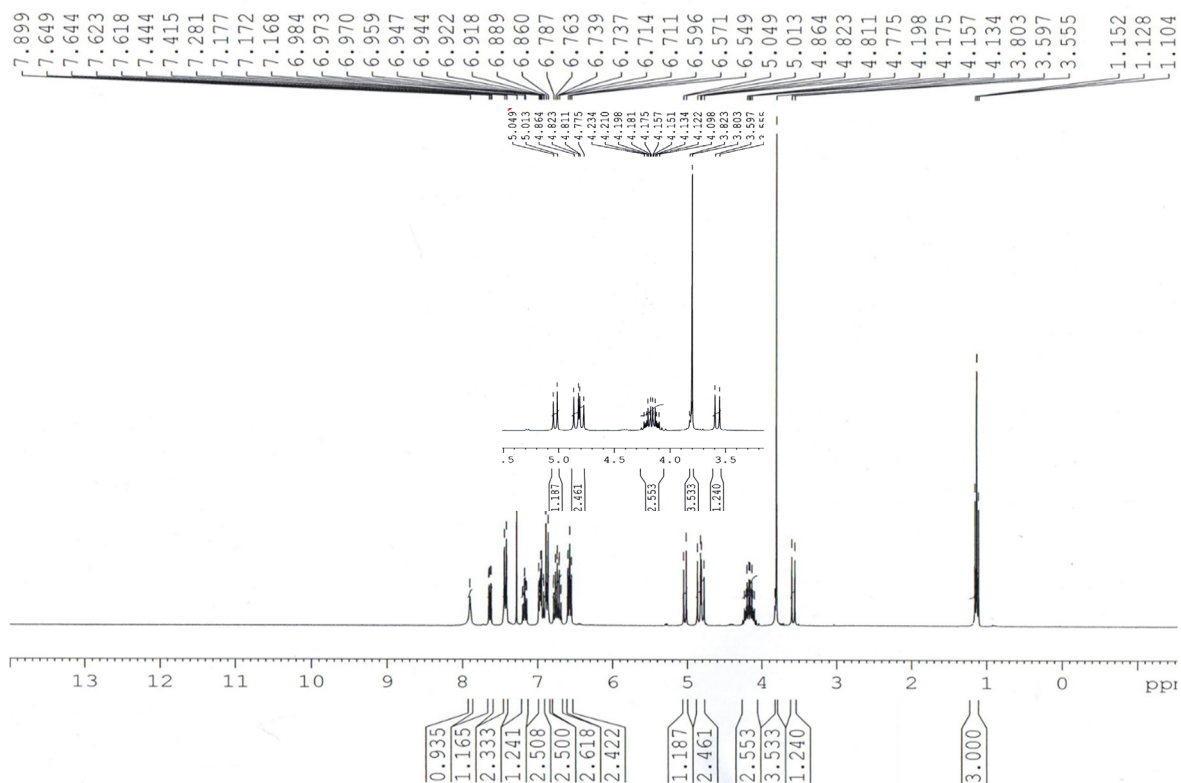

**Figure S18.**  $^1\text{H}$  NMR spectrum of compound **9c** (300 MHz,  $\text{CDCl}_3$ )



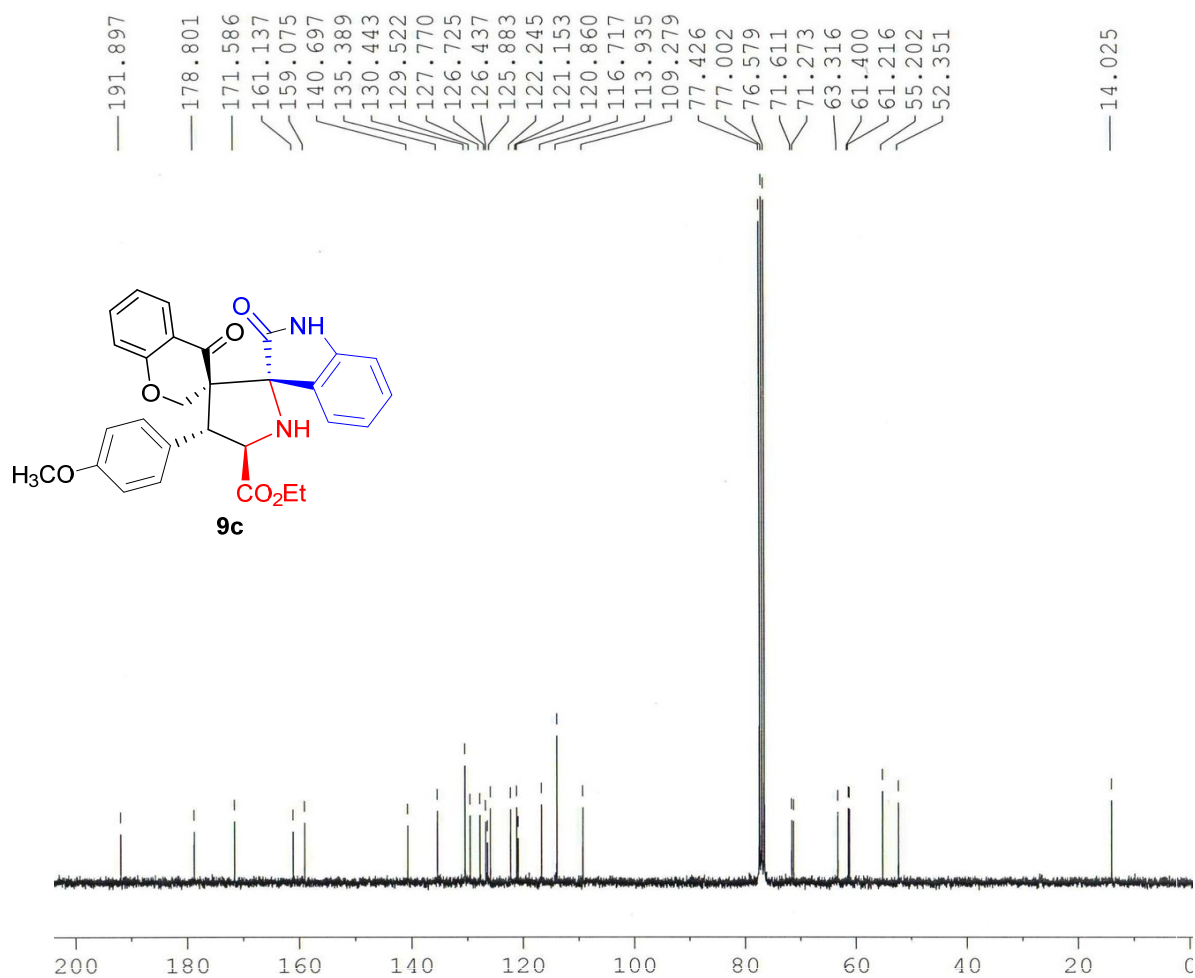

**Figure S19.**  $^{13}\text{C}$   $\{^1\text{H}\}$  NMR spectrum of compound **9c** (75 MHz,  $\text{CDCl}_3$ )

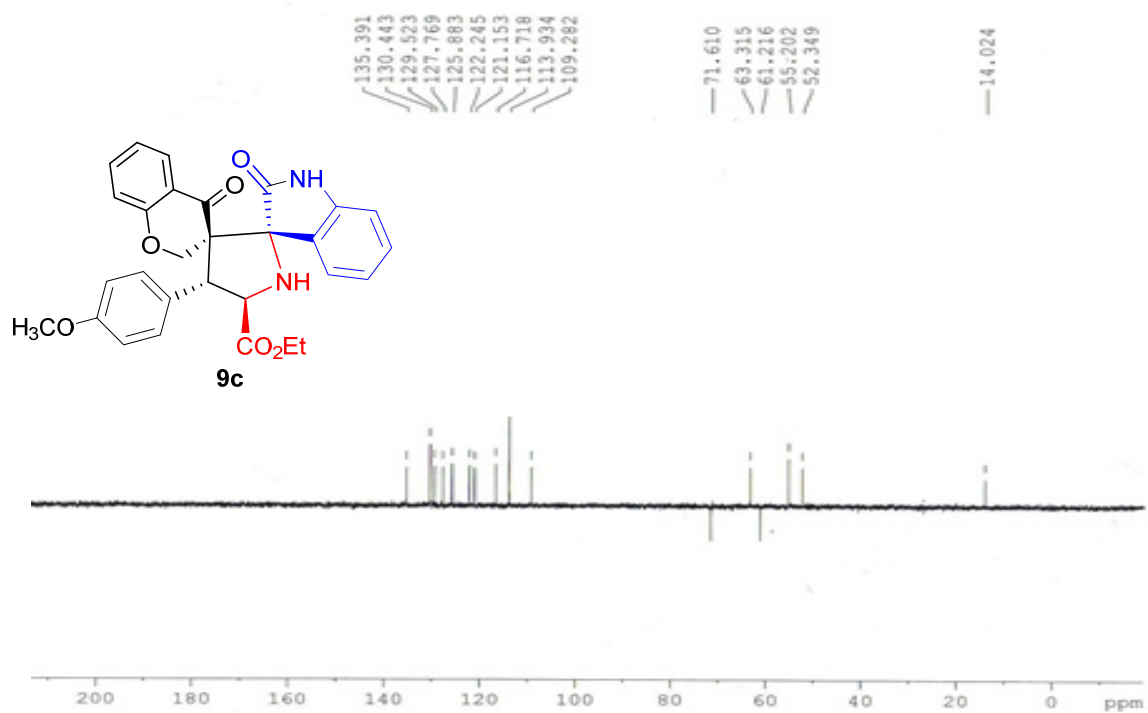

**Figure S20.** DEPT-135  $^{13}\text{C}$  NMR spectrum of compound **9c** (75 MHz,  $\text{CDCl}_3$ )

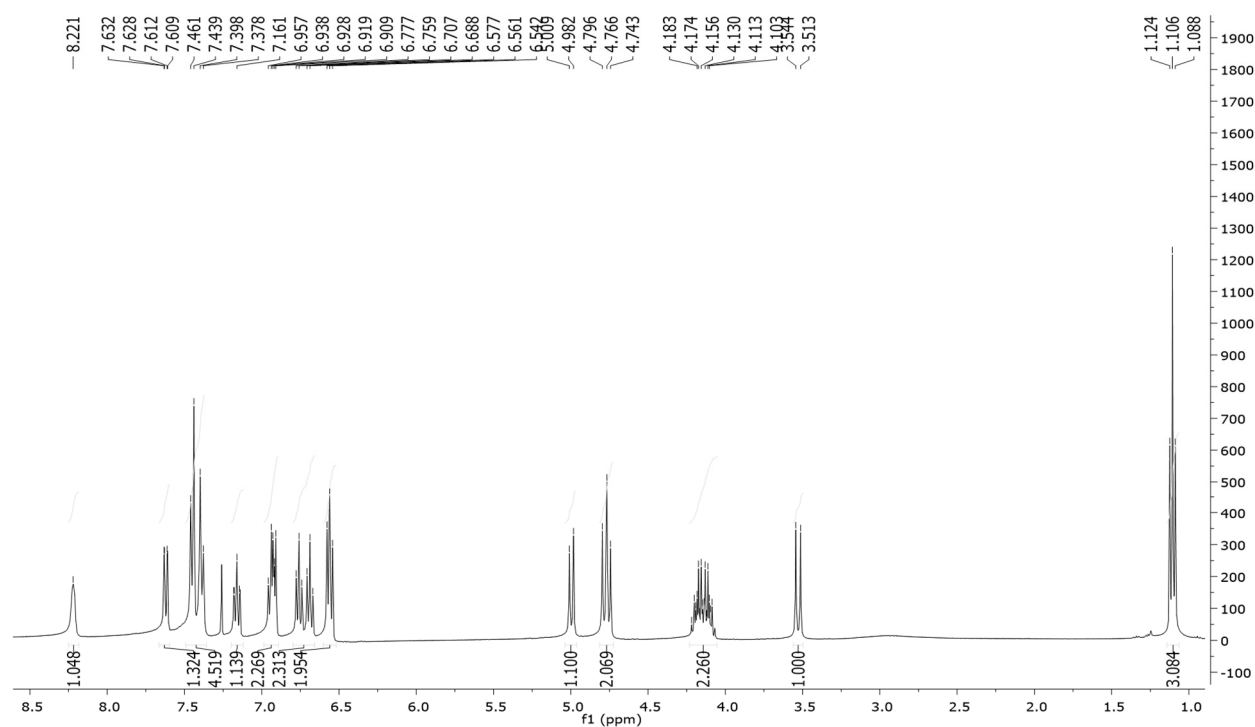

**Figure S21.**  $^1\text{H}$  NMR spectrum of compound **9d** (400 MHz,  $\text{CDCl}_3$ )

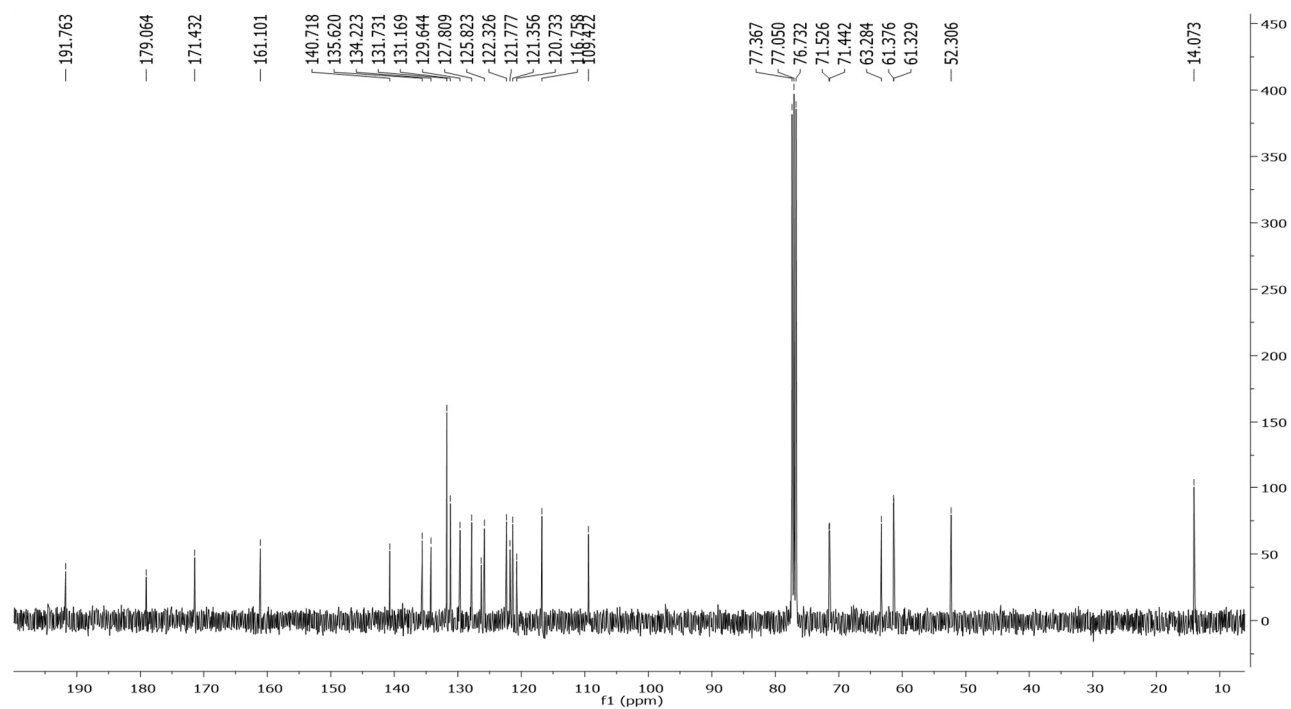

**Figure S22.**  $^{13}\text{C}$   $\{^1\text{H}\}$  NMR spectrum of compound **9d** (100 MHz,  $\text{CDCl}_3$ )

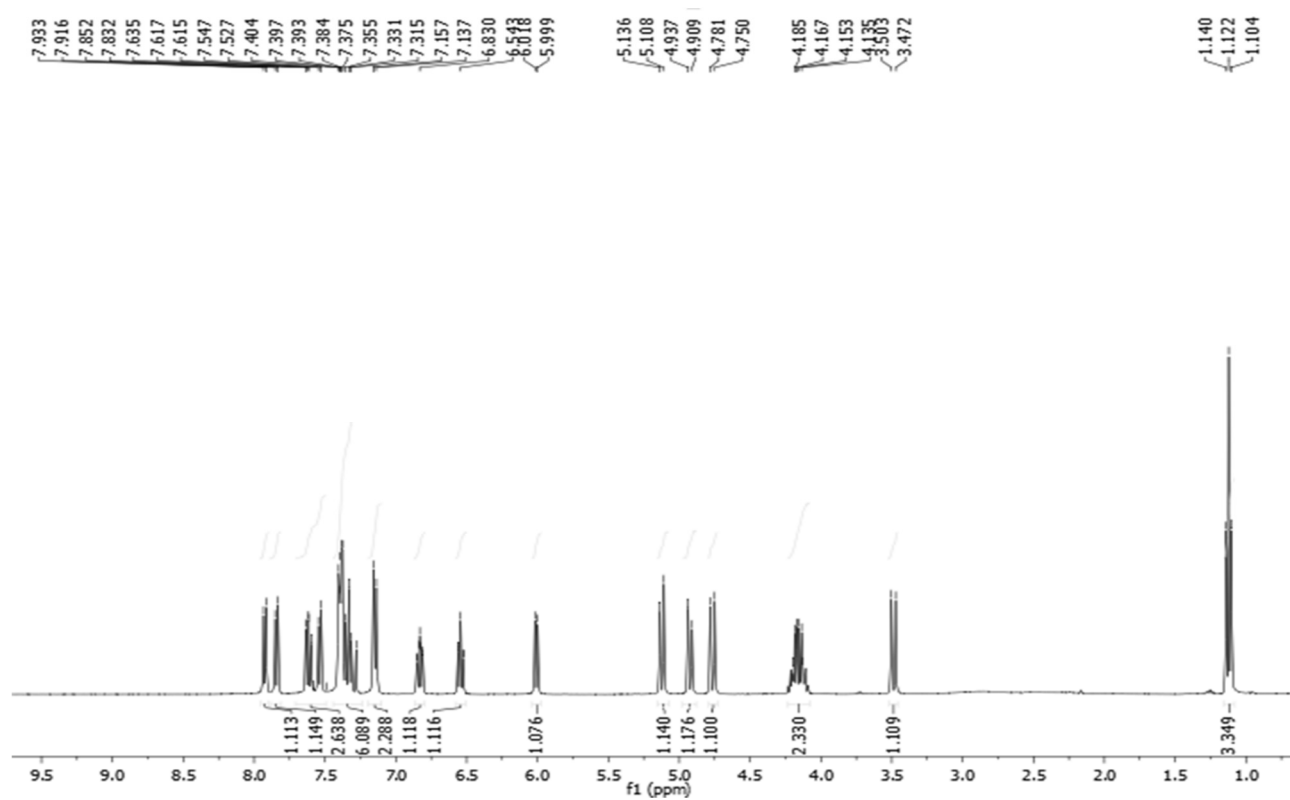

**Figure S23.** <sup>1</sup>H NMR spectrum of compound **9e** (400 MHz, CDCl<sub>3</sub>)

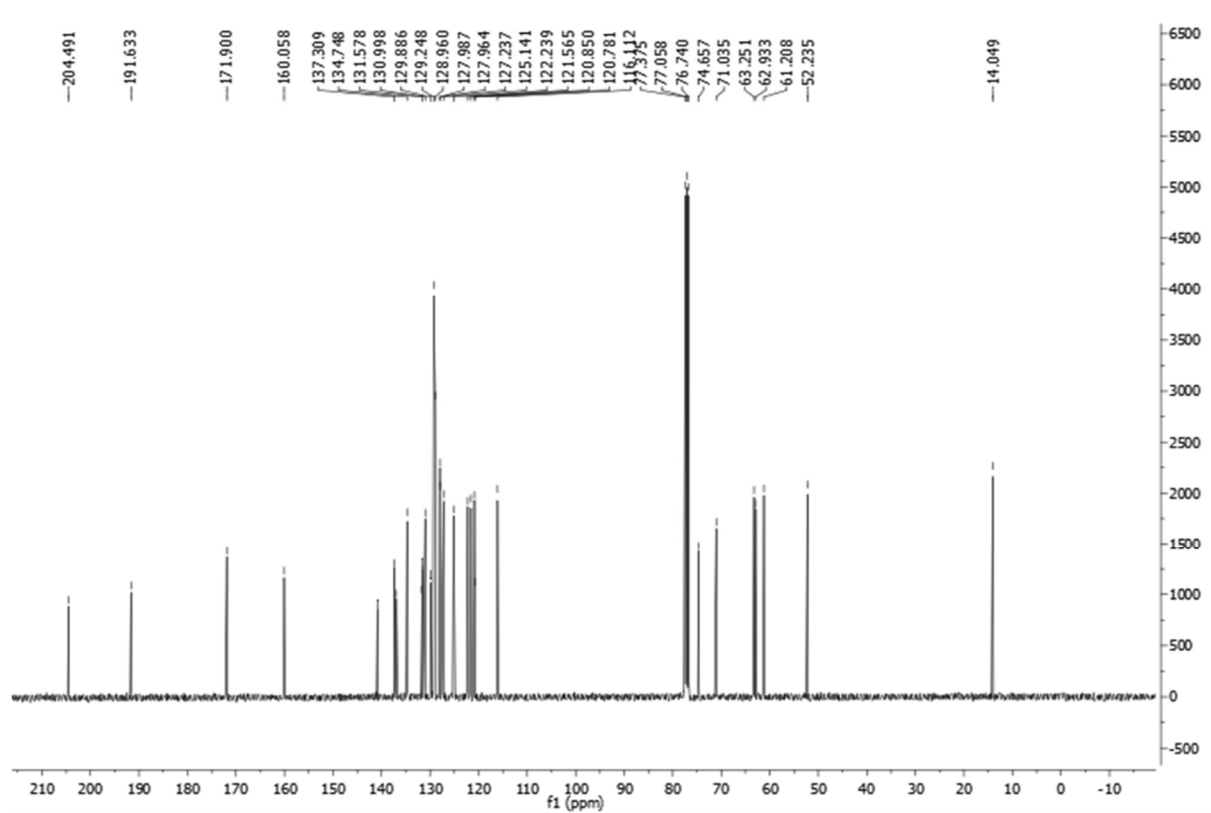

**Figure S24.** <sup>13</sup>C {<sup>1</sup>H} NMR spectrum of compound **9e** (100 MHz, CDCl<sub>3</sub>)

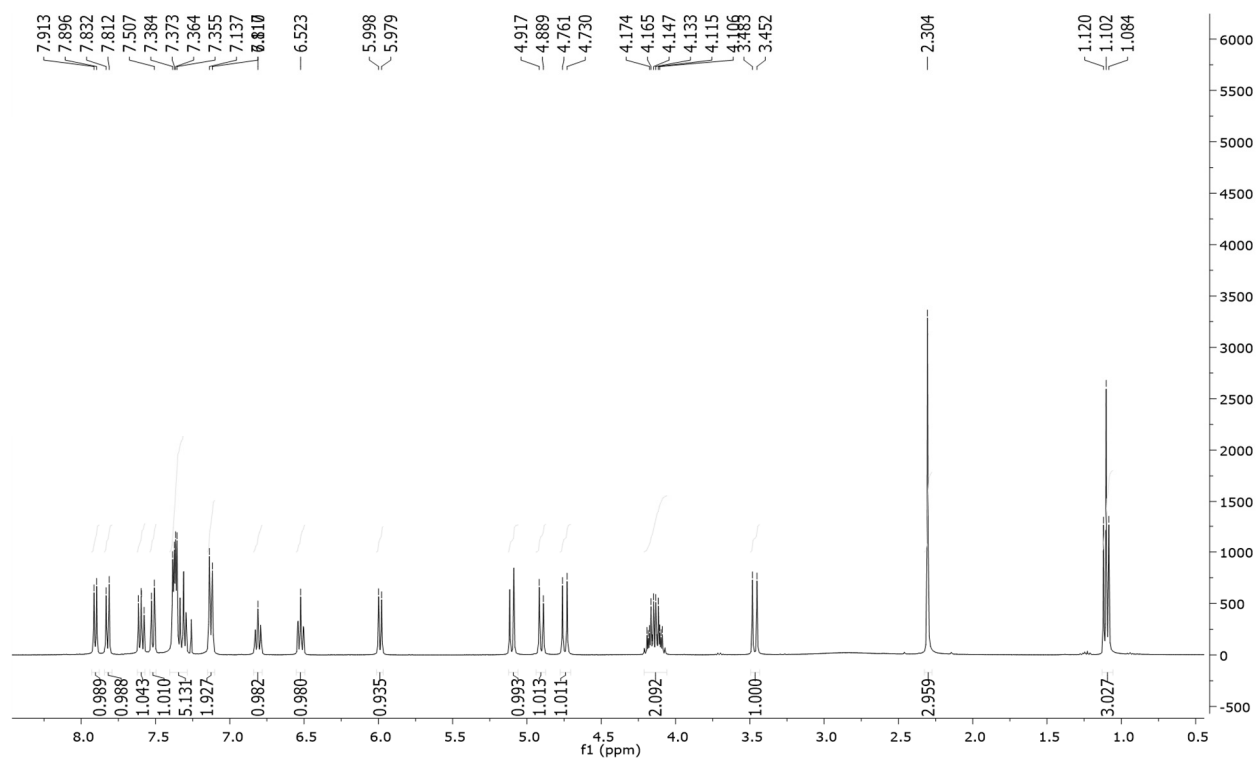

**Figure S25.** <sup>1</sup>H NMR spectrum of compound **9f** (400 MHz, CDCl<sub>3</sub>)

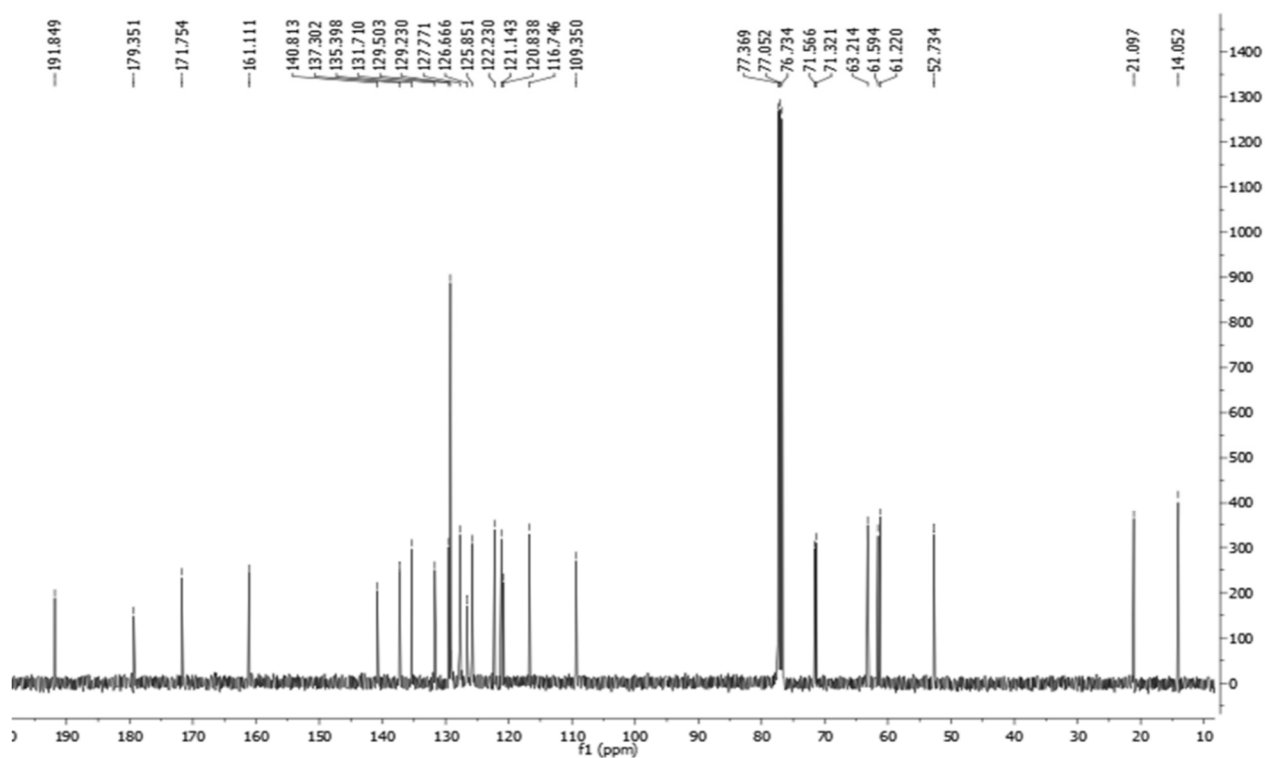

**Figure S26.** <sup>13</sup>C {<sup>1</sup>H} NMR spectrum of compound **9f** (100 MHz, CDCl<sub>3</sub>)

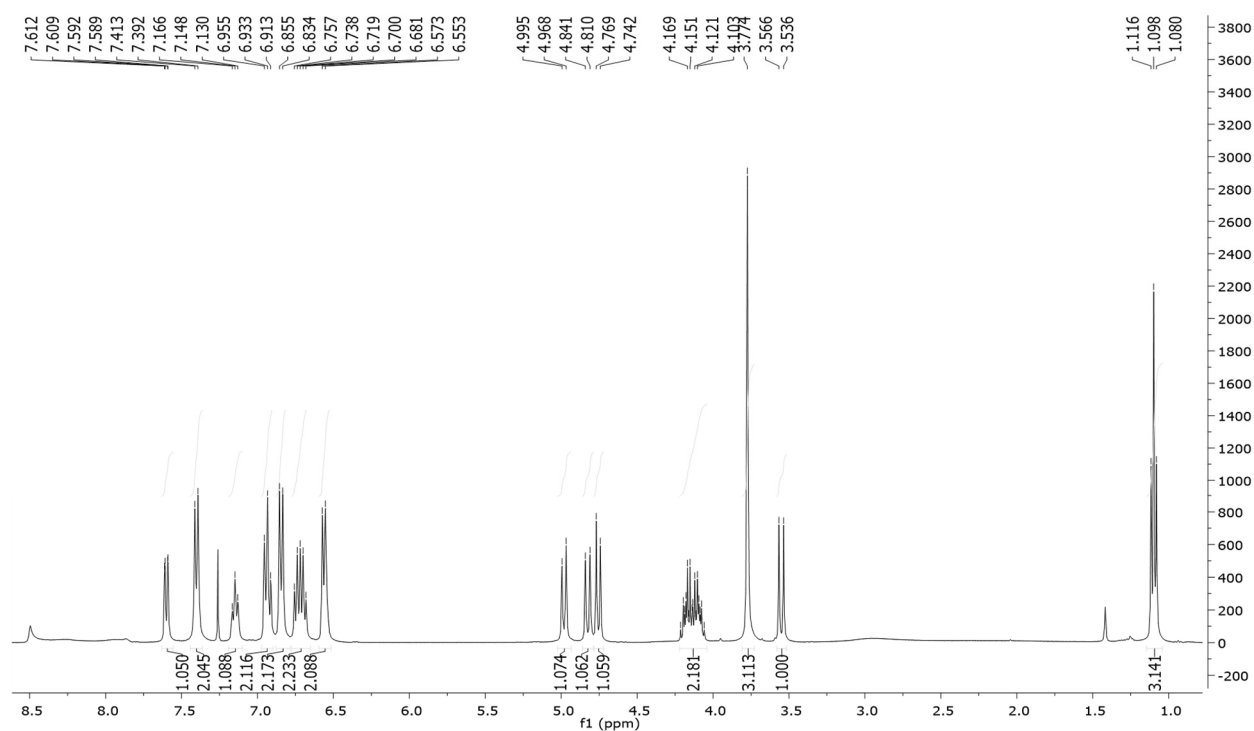

**Figure S27.** <sup>1</sup>H NMR spectrum of compound **9g** (400 MHz, CDCl<sub>3</sub>)

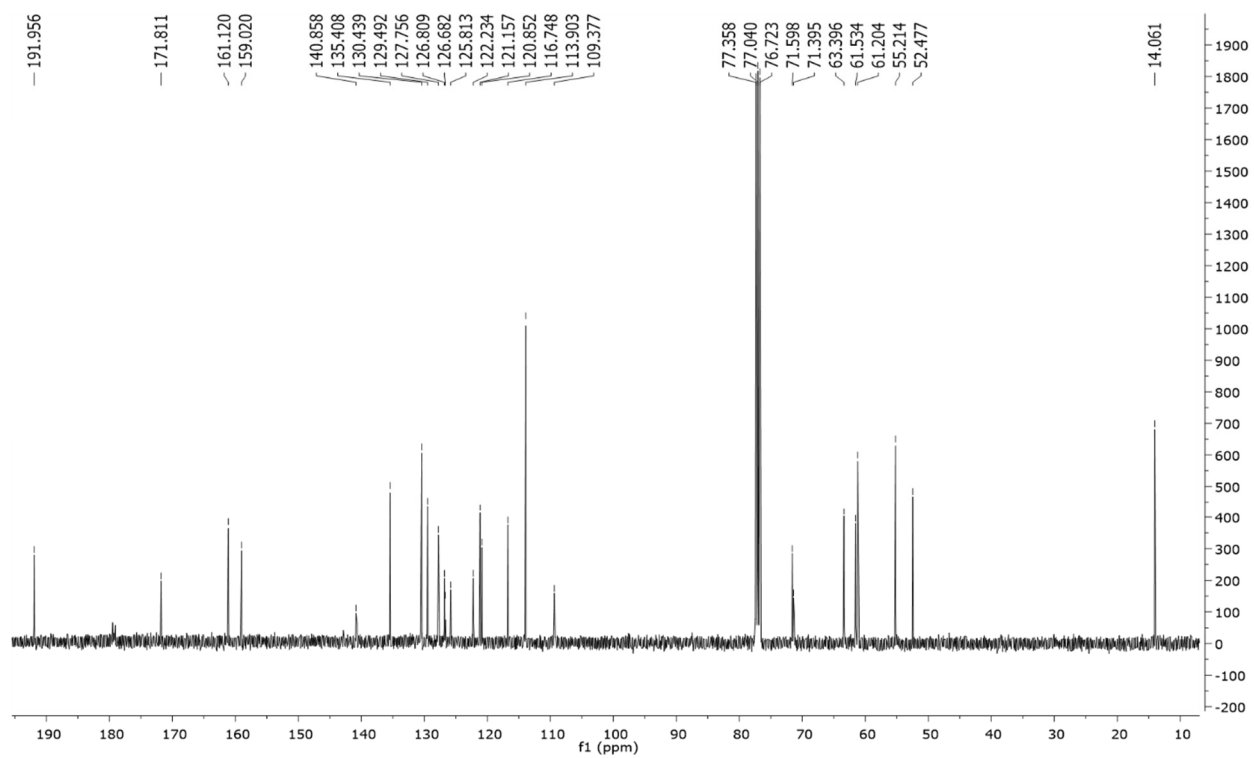

**Figure S28.** <sup>13</sup>C {<sup>1</sup>H} NMR spectrum of compound **9g** (100 MHz, CDCl<sub>3</sub>)

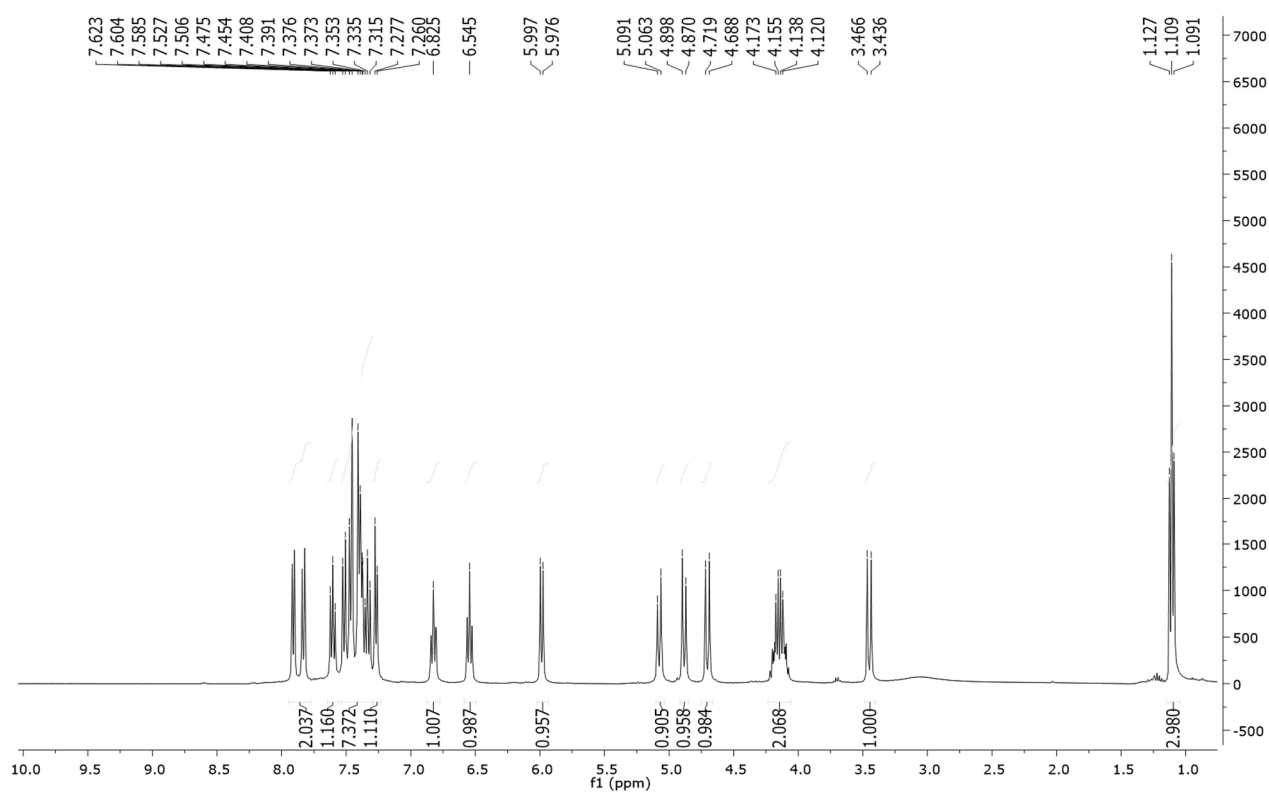

**Figure S29.** <sup>1</sup>H NMR spectrum of compound **9h** (400 MHz, CDCl<sub>3</sub>)

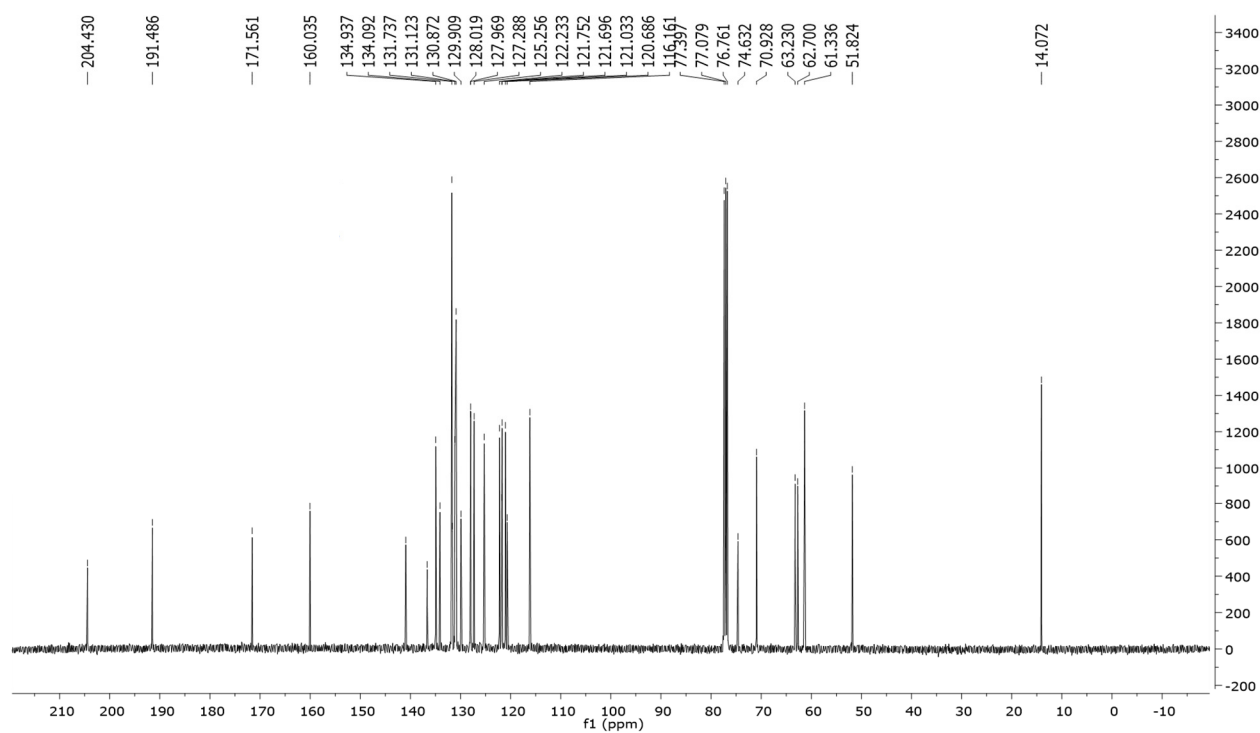

**Figure S30.** <sup>13</sup>C {<sup>1</sup>H} NMR spectrum of compound **9h** (100 MHz, CDCl<sub>3</sub>)



2. Table S1. The chemical shifts  $\delta$  [ppm] from the experimental and theoretical  $^1\text{H}$  and  $^{13}\text{C}$  NMR spectra of compounds 4a and 9c.

| Compound                          | 4a       |           | 9c       |           |
|-----------------------------------|----------|-----------|----------|-----------|
| Atom no.                          | Exp.     | Calc.     | Exp.     | Calc.     |
| C-2                               | 71.8     | 77.0      | 71.2     | 78.1      |
| C-3                               | 61.2     | 65.0      | 61.4     | 65.0      |
| C-4                               | 56.7     | 62.4      | 52.3     | 57.3      |
| C-5                               | 62.6     | 74.7      | 63.3     | 75.1      |
| OCH <sub>3</sub> /CH <sub>3</sub> | -        | -         | 55.2     | 54.7      |
| CH <sub>2</sub> ester             | 61.2     | 65.1      | 61.2     | 65.1      |
| CH <sub>3</sub> ester             | 13.9     | 14.7      | 14       | 14.6      |
| C-2''                             | 33.6     | 40.8      | 71.6     | 74.7      |
| C-4''                             | 194.1    | 204.0     | 191.8    | 202.4     |
| C-2'                              | 177.4    | 186.1     | 178.8    | 186.4     |
| (C=O) <sub>ester</sub>            | 171.2    | 184.8     | 171.5    | 184.8     |
| H-4                               | 5.14     | 4.78      | 5.03     | 4.62      |
| H-5                               | 5.02     | 4.45      | 4.79     | 4.36      |
| NH oxindole                       | 8.18     | 6.53      | 7.89     | 6.55      |
| OCH <sub>3</sub>                  | -        | -         | 4.09     | 4.05      |
| CH <sub>2</sub> ester             | 4.12–4.2 | 4.36–4.69 | 4.11–4.2 | 4.36–4.67 |
| CH <sub>3</sub> ester             | 1.10     | 1.38      | 1.13     | 1.38      |
|                                   |          | 1.42      |          | 1.42      |
|                                   |          | 1.60      |          | 1.59      |
| H-2''                             | 3.42     | 2.94      | 3.56     | 3.96      |
|                                   | 2.73     | 3.21      | 4.84     | 4.22      |

### 3. Crystallographic data of 4a, 4e, and 9c.

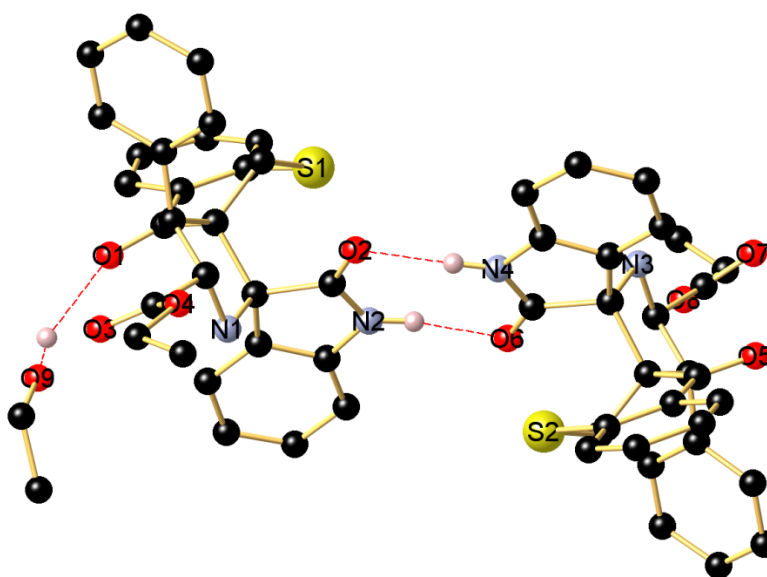

**Figure S31.** Supramolecular interactions occurring through hydrogen bonding in compound 4a. Selected distances and angles:  $d(\text{N2-H2}\cdots\text{O6})$  1.92(3) Å,  $\angle \text{N2-H2-O6}$  171(2)°;  $d(\text{N4-H4}\cdots\text{O2})$  2.01(3) Å,  $\angle \text{N4-H4-O2}$  168(2)°;  $d(\text{O9-H9A}\cdots\text{O1})$  2.12 Å,  $\angle \text{O9-H9A-O1}$  155.9°.

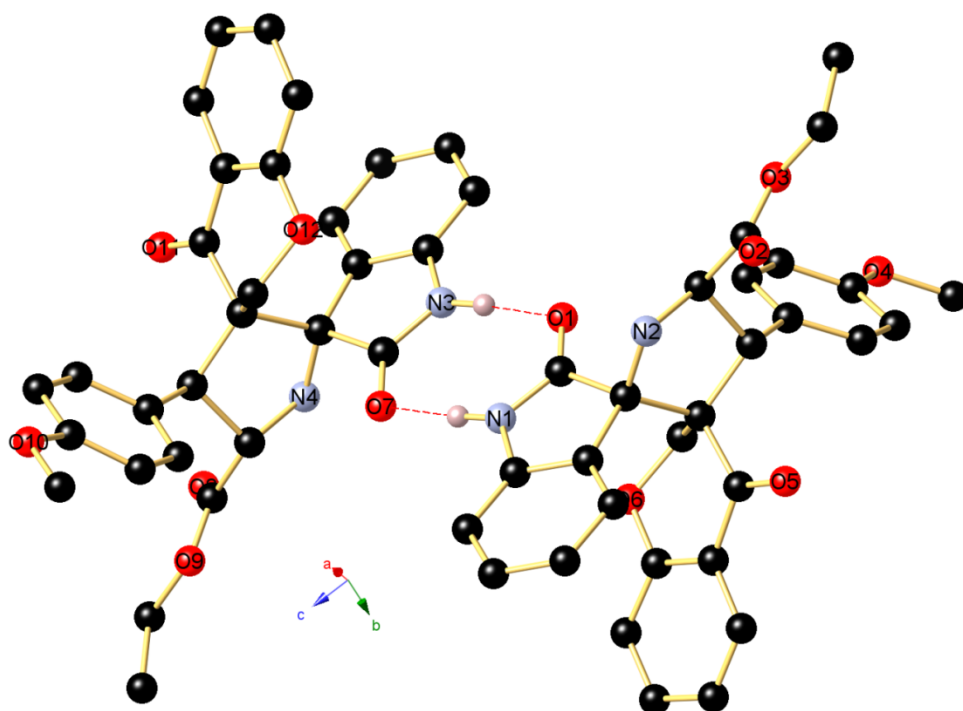

**Figure S32.** Supramolecular interactions occurring in compound **9c**. Selected distances and angles:  $d(\text{N1-H1}\cdots\text{O7})$  1.944(18) Å,  $\angle\text{N1-H1-O7}$  168.7(15)°;  $d(\text{N3-H3}\cdots\text{O1})$  1.920(18) Å,  $\angle\text{N3-H3-O1}$  170.9(15)°.

**Table S3.** Crystal data collection and structure refinement of **4a**, **4e**, and **9e**

| Compound/formula                      | <b>4a</b> /C <sub>58</sub> H <sub>54</sub> N <sub>4</sub> O <sub>9</sub> S <sub>4</sub> | <b>4e</b> /C <sub>33</sub> H <sub>27</sub> NO <sub>4</sub> S        | <b>9c</b> /C <sub>29</sub> H <sub>26</sub> N <sub>2</sub> O <sub>6</sub> |
|---------------------------------------|-----------------------------------------------------------------------------------------|---------------------------------------------------------------------|--------------------------------------------------------------------------|
| Formula weight                        | 1015.17                                                                                 | 533.61                                                              | 498.52                                                                   |
| Temperature/K                         | 100.0                                                                                   | 100.0                                                               | 100.0                                                                    |
| Wavelength/Å                          | 1.54178                                                                                 | 0.71073                                                             | 0.71073                                                                  |
| Crystal system                        | monoclinic                                                                              | triclinic                                                           | monoclinic                                                               |
| Space group                           | P2 <sub>1</sub> /n                                                                      | P-1                                                                 | P2 <sub>1</sub> /n                                                       |
| <i>a</i> /Å                           | 10.3905(5)                                                                              | 8.280(2)                                                            | 12.3048                                                                  |
| <i>b</i> /Å                           | 29.8564(16)                                                                             | 11.285(4)                                                           | 18.3680(15)                                                              |
| <i>c</i> /Å                           | 15.9869(10)                                                                             | 14.788(3)                                                           | 22.2980(17)                                                              |
| <i>α</i> /°                           | 90                                                                                      | 95.993(11)                                                          | 90                                                                       |
| <i>β</i> /°                           | 97.798(2)                                                                               | 98.876(7)                                                           | 94.285(2)                                                                |
| <i>γ</i> /°                           | 90                                                                                      | 105.035(14)                                                         | 90                                                                       |
| Volume/Å <sup>3</sup>                 | 4913.6(5)                                                                               | 1303.3(6)                                                           | 5025.6(6)                                                                |
| <i>Z</i>                              | 4                                                                                       | 2                                                                   | 8                                                                        |
| Density(calculated)g/cm <sup>-3</sup> | 1.372                                                                                   | 1.360                                                               | 1.318                                                                    |
| Absorp. coefficient/mm <sup>-1</sup>  | 1.516                                                                                   | 0.165                                                               | 0.093                                                                    |
| <i>F</i> (000)                        | 2136.0                                                                                  | 560.0                                                               | 2096.0                                                                   |
| Crystal size/mm <sup>3</sup>          | 0.66 × 0.454 × 0.118                                                                    | 0.433 × 0.184 × 0.074                                               | 0.312 × 0.234 × 0.08                                                     |
| Theta range for data collection       | 5.92 to 144.994                                                                         | 5.416 to 57.998                                                     | 4.494 to 59.998                                                          |
| Index ranges                          | -10 ≤ <i>h</i> ≤ 12,<br>-36 ≤ <i>k</i> ≤ 36,<br>-19 ≤ <i>l</i> ≤ 14                     | -11 ≤ <i>h</i> ≤ 11,<br>-15 ≤ <i>k</i> ≤ 15,<br>-18 ≤ <i>l</i> ≤ 20 | -14 ≤ <i>h</i> ≤ 17,<br>-25 ≤ <i>k</i> ≤ 25,                             |

|                                                                          |                                                                     |                                                                     |                                                                      |
|--------------------------------------------------------------------------|---------------------------------------------------------------------|---------------------------------------------------------------------|----------------------------------------------------------------------|
|                                                                          |                                                                     |                                                                     | $-31 \leq l \leq 31$                                                 |
| <b>Reflections collected</b>                                             | 43226                                                               | 33330                                                               | 111099                                                               |
| <b>Independent reflections</b>                                           | 9705 [ $R_{\text{int}} = 0.0465$ ,<br>$R_{\text{sigma}} = 0.0331$ ] | 6942 [ $R_{\text{int}} = 0.0313$ ,<br>$R_{\text{sigma}} = 0.0253$ ] | 14641 [ $R_{\text{int}} = 0.0507$ ,<br>$R_{\text{sigma}} = 0.0372$ ] |
| <b>Data/restraints/parameters</b>                                        | 9705/0/683                                                          | 6942/0/358                                                          | 14641/0/687                                                          |
| <b>Goodness-of-fit on <math>F^2</math></b>                               | 1.074                                                               | 1.049                                                               | 1.041                                                                |
| <b>Final <math>R</math> indices<br/>[<math>I &gt; 2\sigma(I)</math>]</b> | $R_1 = 0.0475$ , $wR_2 = 0.1244$                                    | $R_1 = 0.0385$ , $wR_2 = 0.0960$                                    | $R_1 = 0.0501$ , $wR_2 = 0.1094$                                     |
| <b><math>R</math> indices (all data)</b>                                 | $R_1 = 0.0543$ , $wR_2 = 0.1287$                                    | $R_1 = 0.0457$ , $wR_2 = 0.1015$                                    | $R_1 = 0.0710$ , $wR_2 = 0.1185$                                     |
| <b>Largest diff. peak and hole/<br/><math>\text{\AA}^{-3}</math></b>     | 0.90/-0.46                                                          | 0.45/-0.34                                                          | 0.46/-0.30                                                           |

### 3. DFT data

**Table S2.** The distribution patterns of the HOMOs and LUMOs of **4a-f** and **9a-h** calculated at the  $\omega$ B97xd/6-31G(d, p) level of theory.

| Compound | HOMO                                                                                | LUMO                                                                                 |
|----------|-------------------------------------------------------------------------------------|--------------------------------------------------------------------------------------|
| 4a       | 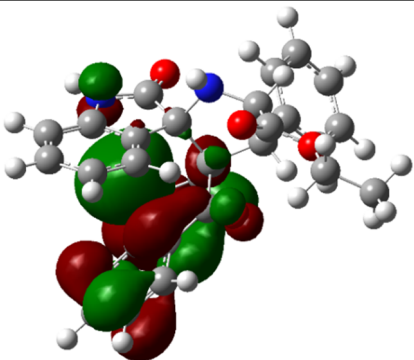   |    |
| 4b       |   |   |
| 4c       |  |  |
| 4d       |  |  |

|    |                                                                                     |                                                                                      |
|----|-------------------------------------------------------------------------------------|--------------------------------------------------------------------------------------|
| 4e | 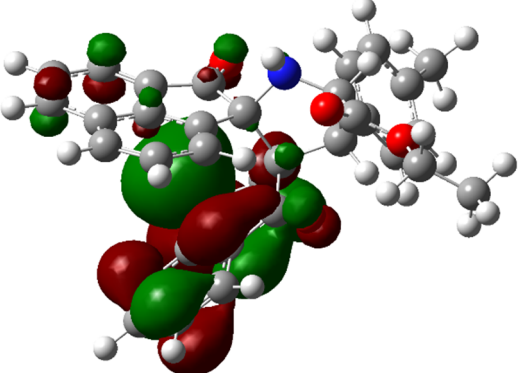   |    |
| 4f |    |    |
| 9a |  |  |
| 9b |  |  |

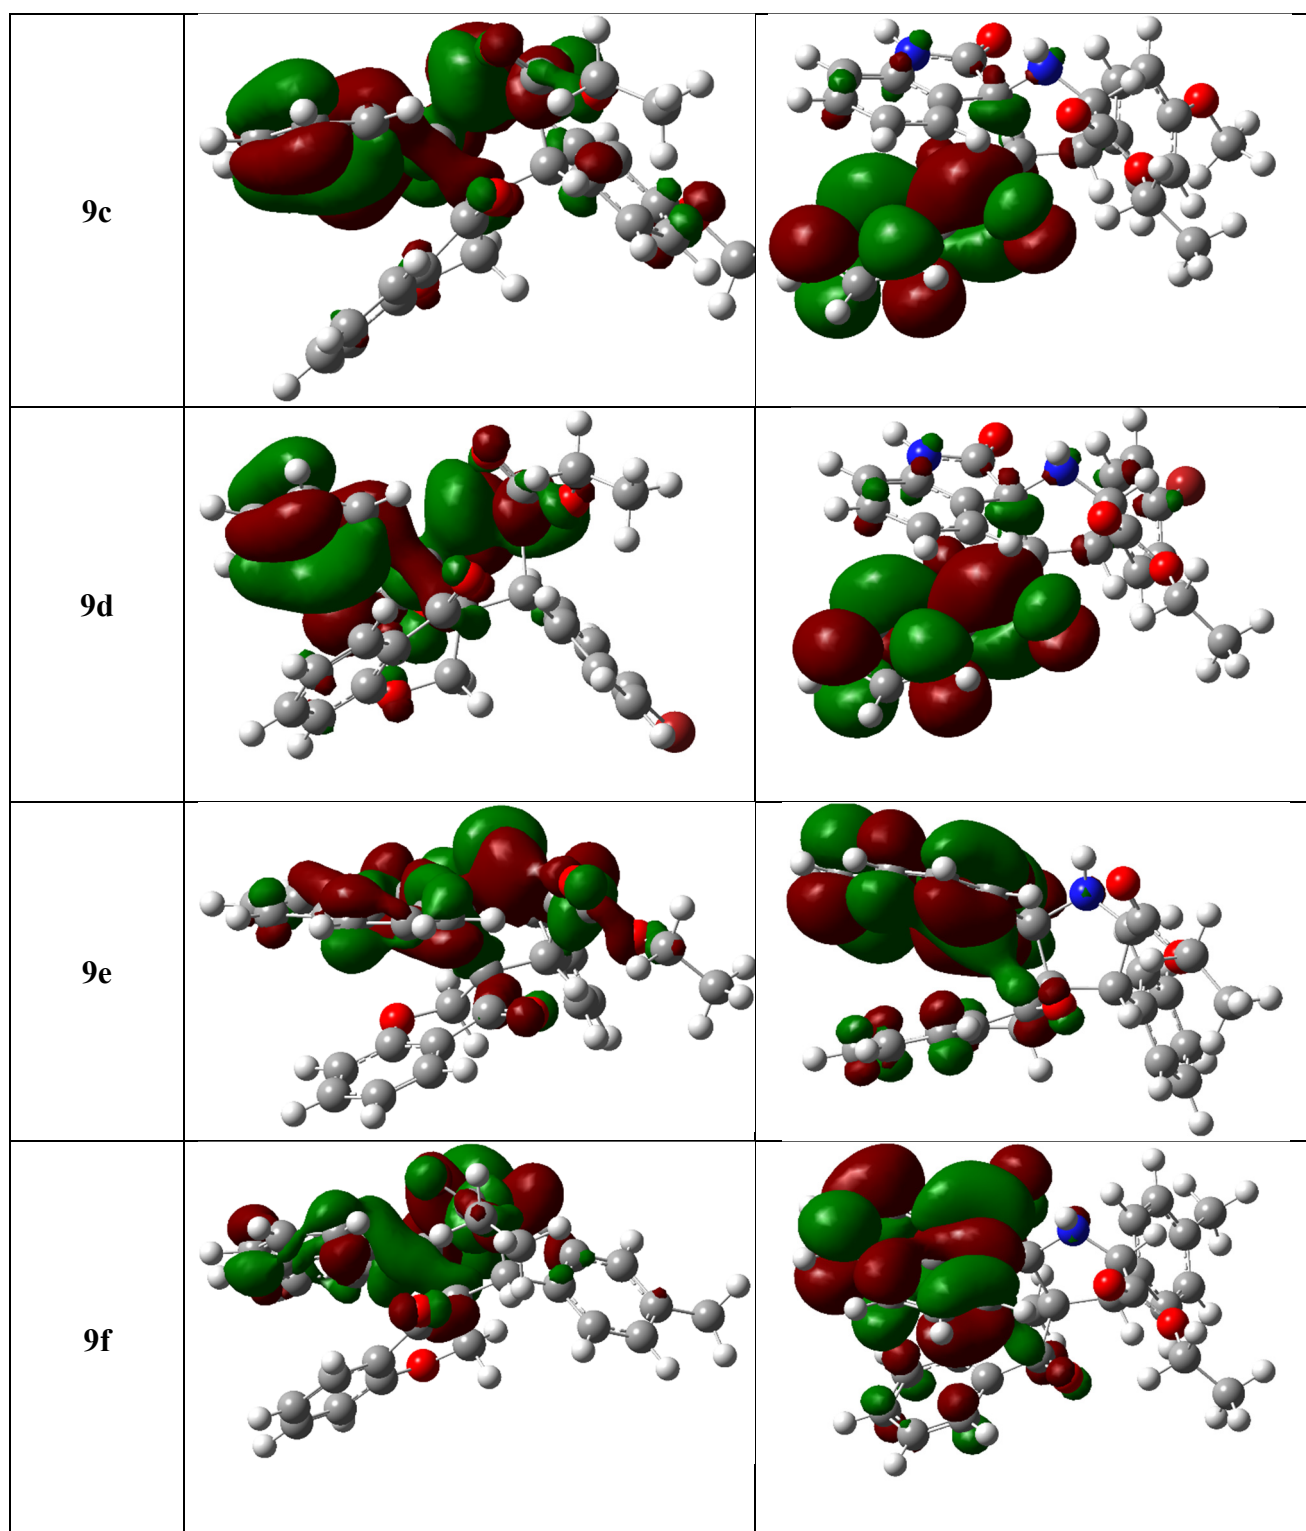



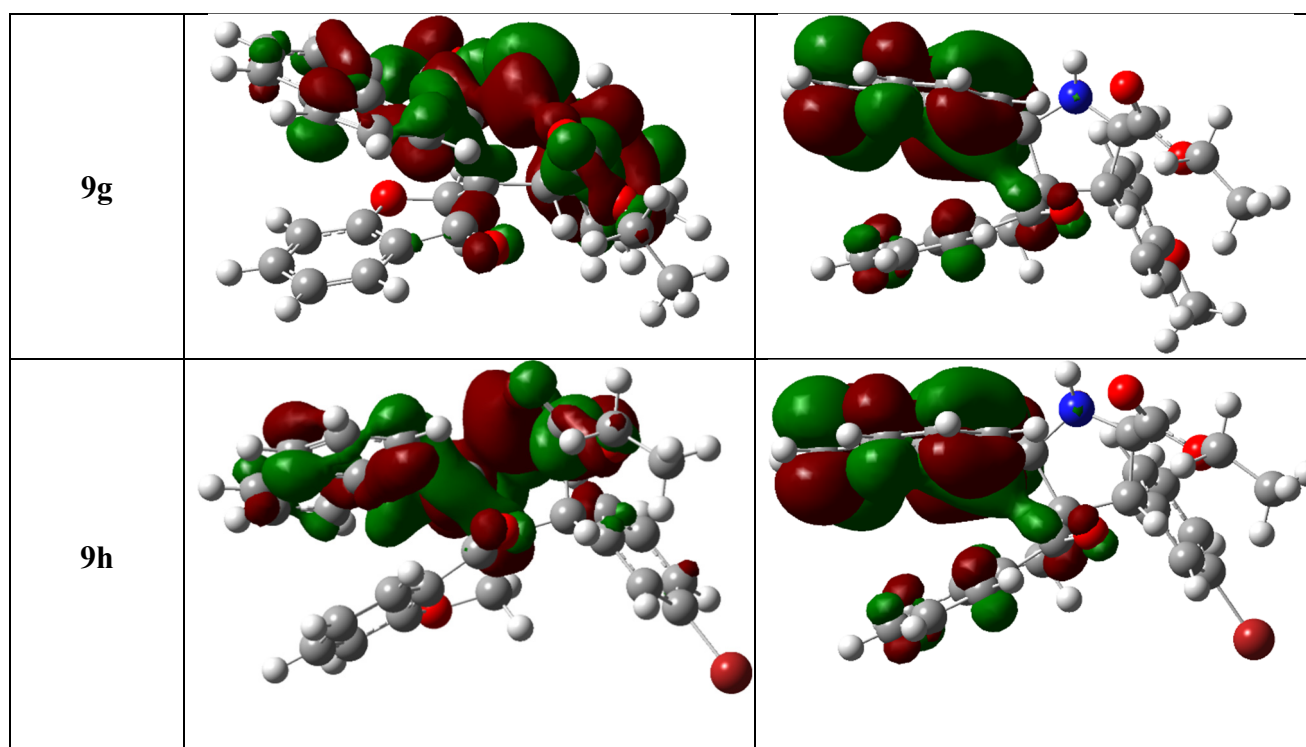

Cartesian coordinates and energies for 1d, (Z,E)-d<sub>3</sub>, *exo*-4d, *endo*-4d, *exo*-5d, *endo*-5d, TS-*exo*-4d, TS-*endo*-4d, TS-*exo*-5d and TS-*endo*-5d at the  $\omega$ B97xd/6-31G(d, p) level of theory.

- 1d

Coordinates (Angstroms)

| Atom | X         | Y         | Z         |
|------|-----------|-----------|-----------|
| S    | -2.306551 | -1.857296 | 0.117925  |
| O    | -2.720354 | 2.542565  | -0.191633 |
| C    | -1.323544 | -0.607740 | 1.005657  |
| H    | -1.781947 | -0.468125 | 1.989892  |
| H    | -0.328286 | -1.024612 | 1.153876  |
| C    | -1.301228 | 0.693259  | 0.263062  |
| C    | -2.628667 | 1.343056  | 0.030740  |
| C    | -3.849456 | 0.478116  | 0.021742  |
| C    | -3.813207 | -0.929577 | 0.003639  |
| C    | -5.090578 | 1.124342  | -0.061492 |
| H    | -5.097977 | 2.208470  | -0.046841 |
| C    | -5.004906 | -1.649512 | -0.126099 |

|    |           |           |           |
|----|-----------|-----------|-----------|
| C  | -0.210263 | 1.335244  | -0.184025 |
| H  | -0.378094 | 2.321636  | -0.612138 |
| H  | -4.976476 | -2.734321 | -0.137446 |
| C  | -6.220675 | -0.986494 | -0.219610 |
| C  | -6.269313 | 0.407345  | -0.176263 |
| H  | -7.220176 | 0.924949  | -0.236671 |
| H  | -7.135862 | -1.561773 | -0.313028 |
| C  | 1.187203  | 0.873347  | -0.144982 |
| C  | 1.551705  | -0.430511 | -0.501903 |
| C  | 2.194696  | 1.777075  | 0.214818  |
| C  | 2.881258  | -0.835384 | -0.467816 |
| H  | 0.796146  | -1.131157 | -0.842572 |
| C  | 3.525714  | 1.383133  | 0.263407  |
| H  | 1.933622  | 2.799139  | 0.470722  |
| C  | 3.854617  | 0.075119  | -0.075360 |
| H  | 3.153925  | -1.845147 | -0.751080 |
| H  | 4.296784  | 2.086166  | 0.555777  |
| Br | 5.671596  | -0.471541 | -0.018781 |

Zero-point correction= 0.226781 (Hartree/Particle)

Electronic energy = -3661.014034

Internal energy = -3660.992567

Enthalpy= -3660.991442

Gibbs energy = -3661.072240

• (Z,E)-**d**<sub>3</sub>

Coordinates (Angstroms)

| Atom | X         | Y         | Z         |
|------|-----------|-----------|-----------|
| O    | 0.361933  | 2.704205  | -0.000344 |
| O    | -2.555148 | -1.710998 | 0.000239  |
| O    | -3.841087 | 0.152725  | 0.000063  |
| N    | 2.534144  | 1.857325  | 0.000354  |
| N    | -0.358854 | -0.175330 | 0.000056  |
| H    | -0.446928 | -1.196578 | 0.000139  |
| C    | -1.543074 | 0.418761  | 0.000015  |

|   |           |           |           |
|---|-----------|-----------|-----------|
| H | -1.608073 | 1.494792  | -0.000102 |
| C | 0.874861  | 0.328897  | 0.000003  |
| C | 2.127763  | -0.390019 | -0.000059 |
| C | 3.134422  | 0.600137  | -0.000038 |
| C | 1.154917  | 1.763095  | -0.000110 |
| C | -2.673876 | -0.491771 | 0.000122  |
| C | -5.023512 | -0.670376 | 0.000172  |
| H | -5.005480 | -1.312261 | 0.885201  |
| C | 3.835644  | -2.073492 | -0.000255 |
| H | 4.125887  | -3.118655 | -0.000340 |
| C | 2.482753  | -1.736707 | -0.000132 |
| H | 1.727344  | -2.516577 | -0.000131 |
| C | 4.480778  | 0.272162  | -0.000115 |
| C | 4.819208  | -1.082222 | -0.000268 |
| H | 5.244488  | 1.042323  | -0.000080 |
| H | 5.866501  | -1.365728 | -0.000369 |
| H | 3.023245  | 2.738214  | -0.001348 |
| H | -5.005698 | -1.312167 | -0.884933 |
| C | -6.219438 | 0.254970  | 0.000363  |
| H | -6.219701 | 0.891330  | -0.887984 |
| H | -7.137375 | -0.337936 | 0.000427  |
| H | -6.219502 | 0.891215  | 0.888793  |

Zero-point correction= 0.230781 (Hartree/Particle)

Electronic energy = -799.228695

Internal energy = -799.208229

Enthalpy= -799.207105

Gibbs energy = -799.283843

• **exo-4d**

Coordinates (Angstroms)

| Atom | X         | Y         | Z         |
|------|-----------|-----------|-----------|
| S    | -1.067009 | -2.659632 | 1.169387  |
| O    | -1.649575 | 1.735859  | 1.186125  |
| O    | 0.699213  | -2.083480 | -1.922414 |

|   |           |           |           |
|---|-----------|-----------|-----------|
| O | -1.554304 | 3.195498  | -1.562220 |
| O | 0.069161  | 3.844713  | -0.147174 |
| N | -1.552458 | -2.353600 | -2.262367 |
| N | -0.295724 | 0.759057  | -2.032909 |
| H | -0.977882 | 1.199787  | -2.640914 |
| C | 0.134512  | -1.320007 | 0.972501  |
| H | 0.495994  | -1.026884 | 1.962437  |
| H | 0.966970  | -1.758003 | 0.423194  |
| C | -0.397974 | -0.080009 | 0.245676  |
| C | -1.539103 | 0.523914  | 1.093128  |
| C | -2.528909 | -0.360803 | 1.766871  |
| C | -2.436564 | -1.760971 | 1.816509  |
| C | -3.654806 | 0.264535  | 2.325440  |
| H | -3.709421 | 1.345844  | 2.275630  |
| C | -4.675849 | -0.471248 | 2.897794  |
| H | -5.541365 | 0.029037  | 3.317298  |
| C | -3.473099 | -2.503433 | 2.393769  |
| C | 0.722310  | 1.010213  | 0.101946  |
| H | 0.626820  | 1.699021  | 0.940934  |
| C | 0.353230  | 1.747124  | -1.195014 |
| H | 1.265738  | 2.119186  | -1.677956 |
| C | -0.916340 | -0.309332 | -1.243795 |
| C | -2.423465 | -0.406143 | -1.447604 |
| C | -2.729312 | -1.638133 | -2.030940 |
| C | -0.446698 | -1.684281 | -1.829928 |
| C | 2.146644  | 0.490940  | 0.104215  |
| C | 2.877322  | 0.520134  | 1.293718  |
| H | 2.420006  | 0.913191  | 2.197324  |
| C | 4.188931  | 0.059298  | 1.348218  |
| H | 4.745139  | 0.088345  | 2.277881  |
| C | 4.774326  | -0.429052 | 0.187804  |
| C | 4.075748  | -0.462240 | -1.013220 |
| H | 4.546389  | -0.844433 | -1.911696 |
| C | 2.764541  | -0.001715 | -1.047433 |

|    |           |           |           |
|----|-----------|-----------|-----------|
| H  | 2.205458  | -0.053418 | -1.974726 |
| C  | -0.511333 | 2.987299  | -0.978026 |
| C  | -0.673716 | 5.039231  | 0.164292  |
| C  | -4.753042 | 0.160006  | -1.528867 |
| H  | -5.553975 | 0.867913  | -1.345739 |
| C  | -3.436051 | 0.514638  | -1.227077 |
| H  | -3.208818 | 1.496423  | -0.828020 |
| C  | -4.583748 | -1.864635 | 2.922673  |
| H  | -5.378422 | -2.455988 | 3.365401  |
| H  | -3.398054 | -3.585384 | 2.435093  |
| C  | -5.042467 | -1.092310 | -2.064932 |
| C  | -4.027479 | -2.011613 | -2.337228 |
| H  | -4.244713 | -2.976637 | -2.781522 |
| H  | -6.070260 | -1.356832 | -2.291094 |
| H  | -1.504213 | -3.272716 | -2.674201 |
| C  | 0.124151  | 5.814454  | 1.187973  |
| H  | -0.823660 | 5.610429  | -0.755773 |
| H  | -1.653397 | 4.743520  | 0.548501  |
| H  | 1.104073  | 6.091020  | 0.791084  |
| H  | -0.412056 | 6.729435  | 1.451484  |
| H  | 0.266756  | 5.223784  | 2.096329  |
| Br | 6.567308  | -1.059046 | 0.241442  |

Zero-point correction = 0.463108 (Hartree/Particle)

Electronic energy = -4460.309188

Internal energy = -4460.267299

Enthalpy= -4460.266174

Gibbs energy = -4460.390856

• *endo-4d*

Coordinates (Angstroms)

| Atom | X         | Y         | Z         |
|------|-----------|-----------|-----------|
| S    | -0.214300 | 1.745078  | -1.688602 |
| O    | -1.284987 | 1.005585  | 2.222876  |
| O    | -1.813372 | -1.953534 | 2.806988  |

|   |           |           |           |
|---|-----------|-----------|-----------|
| O | 0.681946  | -3.027937 | -1.837616 |
| O | 2.187781  | -3.252704 | -0.179033 |
| N | -3.759110 | -1.051662 | 1.967641  |
| N | -1.318554 | -2.620693 | 0.017715  |
| H | -1.345148 | -2.750531 | -0.991380 |
| C | -0.869300 | 0.087561  | -1.307200 |
| H | -1.850287 | 0.061341  | -1.776227 |
| H | -0.245773 | -0.642908 | -1.823527 |
| C | -0.989568 | -0.233365 | 0.192816  |
| C | -1.410698 | 0.994351  | 1.010845  |
| C | -2.036556 | 2.155618  | 0.318910  |
| C | -1.549020 | 2.619658  | -0.911320 |
| C | -3.076165 | 2.837087  | 0.955607  |
| H | -3.439118 | 2.464957  | 1.907878  |
| C | -3.630155 | 3.969524  | 0.373648  |
| H | -4.445597 | 4.489295  | 0.864189  |
| C | -2.089542 | 3.769741  | -1.482347 |
| C | 0.258153  | -0.923772 | 0.804965  |
| H | 0.087416  | -0.888004 | 1.880983  |
| C | 0.073282  | -2.444252 | 0.427174  |
| H | 0.287953  | -3.027963 | 1.324943  |
| C | -2.049870 | -1.423551 | 0.387430  |
| C | -3.389583 | -1.230002 | -0.284216 |
| C | -4.344221 | -0.947480 | 0.699456  |
| C | -2.475814 | -1.520082 | 1.886028  |
| C | 1.604732  | -0.268948 | 0.573720  |
| C | 2.201061  | 0.387203  | 1.653375  |
| H | 1.688601  | 0.413389  | 2.609960  |
| C | 3.439478  | 1.011116  | 1.537560  |
| H | 3.884623  | 1.510361  | 2.390170  |
| C | 4.097140  | 0.974772  | 0.316430  |
| C | 3.530876  | 0.339191  | -0.782126 |
| H | 4.048444  | 0.316356  | -1.733994 |
| C | 2.291424  | -0.272518 | -0.645814 |



|    |           |           |           |
|----|-----------|-----------|-----------|
| H  | 1.877030  | -0.762041 | -1.520133 |
| C  | 0.995814  | -2.946948 | -0.665161 |
| C  | 3.233560  | -3.570715 | -1.123575 |
| C  | -5.112405 | -1.036515 | -1.945542 |
| H  | -5.426311 | -1.090891 | -2.981807 |
| C  | -3.781626 | -1.304941 | -1.611832 |
| H  | -3.079267 | -1.583277 | -2.391398 |
| C  | -3.126356 | 4.439257  | -0.838386 |
| H  | -3.550366 | 5.328141  | -1.293575 |
| H  | -1.708589 | 4.132213  | -2.431170 |
| C  | -6.032871 | -0.703948 | -0.955957 |
| C  | -5.663290 | -0.664168 | 0.390414  |
| H  | -6.386068 | -0.439574 | 1.166553  |
| H  | -7.060856 | -0.489270 | -1.228284 |
| H  | -4.280926 | -1.074534 | 2.831265  |
| C  | 4.552630  | -3.391976 | -0.407136 |
| H  | 3.082337  | -4.597077 | -1.467589 |
| H  | 3.143918  | -2.902898 | -1.983634 |
| H  | 4.620362  | -4.051751 | 0.461115  |
| H  | 5.371968  | -3.632144 | -1.089010 |
| H  | 4.668158  | -2.356505 | -0.075712 |
| Br | 5.798639  | 1.799311  | 0.141663  |

Zero-point correction= 0.464111 (Hartree/Particle)

Electronic energy = -4460.296984

Internal energy = -4460.255220

Enthalpy= -4460.254096

Gibbs energy = -4460.379361

• **exo-5d**

Coordinates (Angstroms)

| Atom | X         | Y         | Z         |
|------|-----------|-----------|-----------|
| S    | -2.078624 | -1.679389 | -1.707428 |
| O    | -1.731377 | -0.553533 | 2.575046  |
| O    | -0.011589 | 1.588211  | -2.049592 |

|   |           |           |           |
|---|-----------|-----------|-----------|
| O | 1.288800  | 3.477599  | -0.044424 |
| O | 2.619317  | 2.326227  | 1.358827  |
| N | -2.281270 | 1.806552  | -2.241588 |
| N | -0.977312 | 2.112272  | 0.906025  |
| C | -0.612382 | -1.194432 | -0.763830 |
| H | -0.153638 | -2.092529 | -0.340449 |
| H | 0.077753  | -0.785830 | -1.500292 |
| C | -0.878447 | -0.189954 | 0.360278  |
| C | -1.838294 | -0.831985 | 1.392682  |
| C | -2.928630 | -1.746727 | 0.946202  |
| C | -3.147446 | -2.136955 | -0.385215 |
| C | -3.831245 | -2.175979 | 1.932229  |
| H | -3.647520 | -1.866744 | 2.954588  |
| C | -4.934829 | -2.945268 | 1.612998  |
| H | -5.623420 | -3.261103 | 2.388607  |
| C | -4.268556 | -2.910446 | -0.706665 |
| C | 0.444892  | 0.200164  | 1.123396  |
| H | 0.343401  | -0.249998 | 2.108857  |
| C | 0.341838  | 1.739324  | 1.364973  |
| H | 0.409253  | 1.912445  | 2.446629  |
| H | -1.510626 | 1.193365  | -0.084563 |
| H | -3.026806 | 1.318985  | -0.142540 |
| H | -3.415376 | 1.672943  | -1.434693 |
| H | -1.129359 | 1.541437  | -1.565804 |
| C | 1.761630  | -0.315354 | 0.573094  |
| C | 2.484593  | -1.227351 | 1.342728  |
| H | 2.076291  | -1.580876 | 2.284893  |
| C | 3.739800  | -1.680047 | 0.945209  |
| H | 4.296236  | -2.374164 | 1.564149  |
| C | 4.272256  | -1.211734 | -0.246876 |
| C | 3.565984  | -0.323773 | -1.050763 |
| H | 3.991961  | 0.033027  | -1.981447 |
| C | 2.316160  | 0.116348  | -0.636403 |
| H | 1.767989  | 0.820839  | -1.253280 |

|    |           |           |           |
|----|-----------|-----------|-----------|
| C  | 1.453439  | 2.605547  | 0.779977  |
| C  | 3.791636  | 2.958919  | 0.812597  |
| C  | -5.323826 | 1.437773  | 0.534640  |
| H  | -6.080217 | 1.358819  | 1.307792  |
| C  | -3.979464 | 1.240779  | 0.859317  |
| H  | -3.688442 | 1.024440  | 1.881189  |
| C  | -5.156829 | -3.304253 | 0.281795  |
| H  | -6.020920 | -3.903668 | 0.014882  |
| H  | -4.433602 | -3.211069 | -1.736440 |
| C  | -5.696075 | 1.741040  | -0.772928 |
| C  | -4.740084 | 1.878099  | -1.781724 |
| H  | -5.022415 | 2.145206  | -2.793923 |
| H  | -6.743578 | 1.890885  | -1.013252 |
| H  | -2.289792 | 2.059235  | -3.218127 |
| C  | 4.997901  | 2.220968  | 1.349656  |
| H  | 3.739534  | 2.906078  | -0.278200 |
| H  | 3.789890  | 4.012519  | 1.105899  |
| H  | 4.997588  | 1.181208  | 1.011765  |
| H  | 5.909421  | 2.702040  | 0.985793  |
| H  | 5.012093  | 2.238597  | 2.442329  |
| Br | 6.015977  | -1.752560 | -0.768192 |
| H  | -1.031316 | 3.082066  | 0.615110  |

Zero-point correction= 0.463138 (Hartree/Particle)

Electronic energy = -4460.303788

Internal energy = -4460.261894

Enthalpy= -4460.260770

Gibbs energy = -4460.385069

• *endo-5d*

Coordinates (Angstroms)

| Atom | X         | Y         | Z         |
|------|-----------|-----------|-----------|
| S    | -0.749237 | -1.735560 | -2.100891 |
| O    | 1.475936  | -2.123031 | 1.668831  |
| O    | 2.359750  | 0.735478  | 2.388968  |

|   |           |           |           |
|---|-----------|-----------|-----------|
| O | 0.418737  | 3.254479  | 1.375032  |
| O | 1.748977  | 3.995729  | -0.289841 |
| N | 4.065583  | -0.646107 | 1.723730  |
| N | 2.398582  | 1.225197  | -0.630326 |
| C | 0.886948  | -1.117120 | -1.609989 |
| H | 1.600175  | -1.924054 | -1.784496 |
| H | 1.115912  | -0.310109 | -2.309332 |
| C | 1.047251  | -0.631272 | -0.159733 |
| C | 0.721386  | -1.798328 | 0.767602  |
| C | -0.579593 | -2.494649 | 0.584625  |
| C | -1.315739 | -2.478599 | -0.611057 |
| C | -1.114439 | -3.142747 | 1.708463  |
| H | -0.528044 | -3.143313 | 2.620638  |
| C | -2.363614 | -3.734627 | 1.666728  |
| H | -2.770737 | -4.216601 | 2.548358  |
| C | -2.576704 | -3.085613 | -0.650813 |
| C | 0.244377  | 0.663332  | 0.230787  |
| H | 0.448330  | 0.792113  | 1.296721  |
| C | 1.042902  | 1.768547  | -0.464817 |
| H | 0.648232  | 2.007100  | -1.460058 |
| C | 2.510201  | -0.072348 | 0.026068  |
| C | 3.670617  | -0.888143 | -0.513815 |
| C | 4.530070  | -1.217266 | 0.539047  |
| C | 2.910633  | 0.054603  | 1.541829  |
| C | -1.259425 | 0.722657  | 0.078856  |
| C | -2.049290 | 0.304865  | 1.153549  |
| H | -1.573088 | -0.044508 | 2.064562  |
| C | -3.436678 | 0.307923  | 1.083180  |
| H | -4.031444 | -0.035649 | 1.921268  |
| C | -4.044502 | 0.763077  | -0.079451 |
| C | -3.291301 | 1.220998  | -1.152495 |
| H | -3.776961 | 1.584939  | -2.050327 |
| C | -1.903549 | 1.196481  | -1.065146 |
| H | -1.332009 | 1.537182  | -1.921300 |

|    |           |           |           |
|----|-----------|-----------|-----------|
| C  | 1.014452  | 3.069182  | 0.330480  |
| C  | 1.854621  | 5.278349  | 0.362380  |
| C  | 5.194365  | -1.966280 | -2.027611 |
| H  | 5.472263  | -2.245051 | -3.038081 |
| C  | 4.027721  | -1.228408 | -1.809743 |
| H  | 3.424778  | -0.912133 | -2.653315 |
| C  | -3.096585 | -3.698487 | 0.478049  |
| H  | -4.080007 | -4.154416 | 0.430772  |
| H  | -3.149623 | -3.072462 | -1.572667 |
| C  | 6.005492  | -2.332953 | -0.956602 |
| C  | 5.691300  | -1.949081 | 0.348123  |
| H  | 6.340688  | -2.197360 | 1.180250  |
| H  | 6.908446  | -2.907161 | -1.136764 |
| H  | 4.536475  | -0.694876 | 2.613834  |
| C  | 2.727754  | 6.156997  | -0.504125 |
| H  | 0.849556  | 5.691047  | 0.482524  |
| H  | 2.283230  | 5.129675  | 1.357022  |
| H  | 2.285912  | 6.289350  | -1.494728 |
| H  | 2.830217  | 7.139965  | -0.037858 |
| H  | 3.724424  | 5.723654  | -0.618310 |
| Cl | -5.941171 | 0.767925  | -0.200408 |
| H  | 3.133653  | 1.872875  | -0.374106 |

Zero-point correction= 0.463203 (Hartree/Particle)

Electronic energy = -4460.301209

Internal energy = -4460.259197

Enthalpy= -4460.258073

Gibbs energy = -4460.384203

• **TS-*exo*-4d**

Coordinates (Angstroms)

| Atom | X         | Y         | Z         |
|------|-----------|-----------|-----------|
| S    | 2.613874  | -2.227575 | 1.059995  |
| O    | 2.668773  | -0.085394 | -2.827445 |
| O    | -0.352143 | 0.756748  | 2.956203  |

|   |           |           |           |
|---|-----------|-----------|-----------|
| O | -2.454088 | 2.666181  | -1.518943 |
| O | -4.036507 | 1.928731  | -0.075270 |
| N | 1.931123  | 1.031142  | 2.570766  |
| N | -0.565888 | 2.036871  | 0.279125  |
| C | 1.581335  | -2.560509 | -0.401629 |
| H | 2.077869  | -3.342308 | -0.985247 |
| H | 0.631162  | -2.956304 | -0.045546 |
| C | 1.422641  | -1.325468 | -1.232115 |
| C | 2.683139  | -0.763161 | -1.809251 |
| C | 3.961186  | -1.012854 | -1.076713 |
| C | 4.029316  | -1.589100 | 0.206140  |
| C | 5.142279  | -0.558030 | -1.676235 |
| H | 5.066777  | -0.112808 | -2.661828 |
| C | 6.361746  | -0.647924 | -1.027418 |
| H | 7.265314  | -0.291286 | -1.509349 |
| C | 5.259329  | -1.660969 | 0.866226  |
| C | 0.274289  | -0.689907 | -1.509388 |
| H | 0.350618  | 0.146548  | -2.201803 |
| C | -1.834927 | 1.871061  | 0.613641  |
| H | -2.089777 | 1.433699  | 1.564767  |
| C | 0.559603  | 1.742684  | 0.930216  |
| C | 1.916054  | 1.974093  | 0.493180  |
| C | 2.738106  | 1.527742  | 1.548921  |
| C | 0.590007  | 1.127329  | 2.253598  |
| C | -1.071949 | -0.991730 | -0.998093 |
| C | -2.166487 | -0.912504 | -1.867938 |
| H | -2.006478 | -0.660461 | -2.911355 |
| C | -3.457594 | -1.156698 | -1.417959 |
| H | -4.297820 | -1.107631 | -2.100852 |
| C | -3.656963 | -1.457352 | -0.075463 |
| C | -2.594789 | -1.516022 | 0.817355  |
| H | -2.768040 | -1.722229 | 1.866912  |
| C | -1.306124 | -1.282733 | 0.350952  |
| H | -0.486074 | -1.263310 | 1.061712  |

|    |           |           |           |
|----|-----------|-----------|-----------|
| C  | -2.782567 | 2.204509  | -0.432470 |
| C  | -5.051306 | 2.168494  | -1.066982 |
| C  | 3.881249  | 2.602530  | -0.723968 |
| H  | 4.345890  | 3.012976  | -1.613965 |
| C  | 2.493177  | 2.510314  | -0.654779 |
| H  | 1.881498  | 2.847919  | -1.485755 |
| C  | 6.413452  | -1.189429 | 0.256751  |
| H  | 7.360609  | -1.260356 | 0.781542  |
| H  | 5.311052  | -2.104468 | 1.855497  |
| C  | 4.680847  | 2.163487  | 0.333178  |
| C  | 4.119276  | 1.611978  | 1.484383  |
| H  | 4.741213  | 1.251416  | 2.296093  |
| H  | 5.760320  | 2.231532  | 0.252693  |
| H  | 2.259907  | 0.674985  | 3.453965  |
| C  | -6.388678 | 1.922355  | -0.406312 |
| H  | -4.950425 | 3.190593  | -1.440533 |
| H  | -4.884583 | 1.481964  | -1.902780 |
| H  | -6.570194 | 2.643003  | 0.394791  |
| H  | -7.186705 | 2.016626  | -1.146809 |
| H  | -6.417839 | 0.912452  | 0.010134  |
| Br | -5.419713 | -1.774625 | 0.550495  |
| H  | -0.465160 | 2.451187  | -0.652068 |

Zero-point correction= 0.458859 (Hartree/Particle)

Electronic energy = -4460.270780

Internal energy = -4460.227758

Enthalpy= -4460.226634

Gibbs energy = -4460.355380

- **TS-endo-4d**

Coordinates (Angstroms)

| Atom | X         | Y         | Z         |
|------|-----------|-----------|-----------|
| S    | -3.726483 | -2.701971 | -0.327423 |
| O    | -2.718690 | 0.703718  | -2.735385 |
| O    | -0.501433 | 3.237532  | -1.037480 |

|   |           |           |           |
|---|-----------|-----------|-----------|
| O | 3.825718  | 1.192712  | 1.230763  |
| O | 4.326600  | 2.587606  | -0.488762 |
| N | -2.215519 | 2.307656  | 0.240893  |
| N | 1.217614  | 1.686644  | 0.826219  |
| H | 1.668451  | 1.095822  | 1.532237  |
| C | -2.121444 | -1.869506 | -0.115100 |
| H | -2.116468 | -1.415121 | 0.880084  |
| H | -1.382738 | -2.673371 | -0.125277 |
| C | -1.810475 | -0.853850 | -1.182266 |
| C | -2.919602 | -0.058456 | -1.798691 |
| C | -4.282198 | -0.137122 | -1.192867 |
| C | -4.736996 | -1.254155 | -0.476590 |
| C | -5.125361 | 0.967853  | -1.343989 |
| H | -4.763751 | 1.815995  | -1.915911 |
| C | -6.393997 | 0.977570  | -0.781500 |
| H | -7.034292 | 1.845101  | -0.895881 |
| C | -6.017066 | -1.249658 | 0.077447  |
| C | -0.568177 | -0.522453 | -1.583246 |
| H | -0.527048 | 0.218198  | -2.379100 |
| C | 2.100239  | 2.249885  | 0.019638  |
| H | 1.767408  | 2.895085  | -0.777533 |
| C | -0.115439 | 1.752367  | 0.845626  |
| C | -1.019785 | 1.065996  | 1.735148  |
| C | -2.318407 | 1.430153  | 1.316172  |
| C | -0.895676 | 2.530216  | -0.110803 |
| C | 0.738848  | -0.977189 | -1.101422 |
| C | 1.838359  | -0.827269 | -1.958580 |
| H | 1.686353  | -0.430509 | -2.957451 |
| C | 3.121150  | -1.179317 | -1.559633 |
| H | 3.955733  | -1.077172 | -2.243293 |
| C | 3.318593  | -1.650309 | -0.267451 |
| C | 2.254197  | -1.793358 | 0.614962  |
| H | 2.423018  | -2.143215 | 1.626489  |
| C | 0.972469  | -1.467699 | 0.192397  |



|    |           |           |           |
|----|-----------|-----------|-----------|
| H  | 0.164820  | -1.544105 | 0.909154  |
| C  | 3.488311  | 1.942043  | 0.324225  |
| C  | 5.736352  | 2.364362  | -0.280805 |
| C  | -1.998901 | -0.346804 | 3.409193  |
| H  | -1.888791 | -1.046470 | 4.230463  |
| C  | -0.860580 | 0.176187  | 2.795472  |
| H  | 0.127307  | -0.115403 | 3.139553  |
| C  | -6.838208 | -0.137003 | -0.071360 |
| H  | -7.826935 | -0.139453 | 0.375162  |
| H  | -6.363565 | -2.112778 | 0.635981  |
| C  | -3.276252 | 0.016384  | 2.975167  |
| C  | -3.453528 | 0.915602  | 1.922262  |
| H  | -4.445241 | 1.185653  | 1.574513  |
| H  | -4.149084 | -0.408714 | 3.459045  |
| H  | -2.990971 | 2.721509  | -0.251228 |
| C  | 6.238963  | 1.169285  | -1.094415 |
| H  | 6.201241  | 3.297221  | -0.599046 |
| H  | 5.909124  | 2.228545  | 0.787246  |
| H  | 6.927506  | 1.482807  | -1.881646 |
| H  | 6.740692  | 0.436050  | -0.461320 |
| H  | 5.393559  | 0.668481  | -1.570901 |
| Br | 5.066938  | -2.076794 | 0.316303  |

Zero-point correction= 0.459248 (Hartree/Particle)

Electronic energy = -4460.267383

Internal energy = -4460.224147

Enthalpy= -4460.223023

Gibbs energy = -4460.352871

• TS-*exo*-5d

Coordinates (Angstroms)

| Atom | X         | Y         | Z         |
|------|-----------|-----------|-----------|
| S    | -1.563994 | -2.255020 | -1.621656 |
| O    | -1.977362 | -0.742732 | 2.512934  |
| O    | -0.194533 | 1.173831  | -1.697761 |

|   |           |           |           |
|---|-----------|-----------|-----------|
| O | 0.785487  | 3.457045  | -0.492043 |
| O | 2.515296  | 2.314700  | 0.415253  |
| N | -2.506721 | 1.322418  | -1.922726 |
| N | -0.856806 | 1.682687  | 1.200198  |
| C | -0.478025 | -2.690145 | -0.233791 |
| H | -0.803456 | -3.667366 | 0.139011  |
| H | 0.528455  | -2.804462 | -0.634596 |
| C | -0.528358 | -1.702696 | 0.894374  |
| C | -1.869943 | -1.354960 | 1.449773  |
| C | -3.086704 | -1.688416 | 0.657460  |
| C | -3.061811 | -2.066052 | -0.699647 |
| C | -4.326033 | -1.526076 | 1.291277  |
| H | -4.325236 | -1.210359 | 2.327883  |
| C | -5.513845 | -1.733279 | 0.613334  |
| H | -6.462273 | -1.596685 | 1.120397  |
| C | -4.265014 | -2.256682 | -1.384493 |
| C | 0.549702  | -1.166198 | 1.492758  |
| H | 0.371664  | -0.649367 | 2.431911  |
| C | 0.440364  | 1.894103  | 1.278218  |
| H | 0.920908  | 1.628960  | 2.208733  |
| C | -1.694869 | 1.704134  | 0.146211  |
| C | -3.131222 | 1.697937  | 0.235237  |
| C | -3.601316 | 1.462332  | -1.073876 |
| C | -1.307299 | 1.396641  | -1.223820 |
| C | 1.934735  | -1.179269 | 0.991558  |
| C | 3.001824  | -1.435442 | 1.859031  |
| H | 2.806348  | -1.682452 | 2.897764  |
| C | 4.314457  | -1.388653 | 1.405674  |
| H | 5.137961  | -1.593181 | 2.079682  |
| C | 4.555534  | -1.062777 | 0.075452  |
| C | 3.515874  | -0.787487 | -0.804334 |
| H | 3.723645  | -0.508724 | -1.830756 |
| C | 2.207733  | -0.843096 | -0.340472 |
| H | 1.391940  | -0.556477 | -0.997595 |

|    |           |           |           |
|----|-----------|-----------|-----------|
| C  | 1.220967  | 2.628439  | 0.282493  |
| C  | 3.441514  | 2.973900  | -0.464947 |
| C  | -5.399617 | 1.879034  | 0.985656  |
| H  | -6.118016 | 2.041249  | 1.782340  |
| C  | -4.035546 | 1.918303  | 1.270520  |
| H  | -3.690213 | 2.123404  | 2.279327  |
| C  | -5.479094 | -2.091725 | -0.733587 |
| H  | -6.403102 | -2.251193 | -1.279728 |
| H  | -4.244450 | -2.548621 | -2.429574 |
| C  | -5.850273 | 1.641000  | -0.313856 |
| C  | -4.955186 | 1.434383  | -1.365255 |
| H  | -5.307533 | 1.254620  | -2.375234 |
| H  | -6.916307 | 1.615940  | -0.515220 |
| H  | -2.548385 | 0.934565  | -2.851879 |
| C  | 4.825545  | 2.829640  | 0.131632  |
| H  | 3.376790  | 2.491483  | -1.445116 |
| H  | 3.143939  | 4.018455  | -0.577719 |
| H  | 4.964524  | 3.505590  | 0.979735  |
| H  | 4.977840  | 1.803167  | 0.472133  |
| H  | 5.585153  | 3.053914  | -0.621515 |
| Br | 6.347641  | -0.920939 | -0.533094 |
| H  | -1.284682 | 1.330868  | 2.059967  |

Zero-point correction= 0.458765 (Hartree/Particle)

Electronic energy = -4460.250304

Internal energy = -4460.207166

Enthalpy= -4460.206042

Gibbs energy = -4460.334171

• **TS-endo-5d**

Coordinates (Angstroms)

| Atom | X         | Y         | Z         |
|------|-----------|-----------|-----------|
| S    | 5.250379  | -1.233058 | -1.714644 |
| O    | 4.551015  | 0.932232  | 2.032186  |
| O    | -4.608737 | -0.245295 | 0.213170  |

|   |           |           |           |
|---|-----------|-----------|-----------|
| O | -6.445577 | 0.901366  | -2.401918 |
| O | -5.497306 | 2.140781  | -0.771261 |
| N | -2.802347 | 0.220662  | 1.600371  |
| N | -2.985434 | 1.344620  | -1.756597 |
| C | 3.638027  | -0.540734 | -1.223546 |
| H | 3.469305  | 0.372653  | -1.802848 |
| H | 2.904446  | -1.283498 | -1.537159 |
| C | 3.557793  | -0.279531 | 0.252784  |
| C | 4.665734  | 0.490359  | 0.894756  |
| C | 5.929494  | 0.734441  | 0.134224  |
| C | 6.296079  | 0.013053  | -1.014953 |
| C | 6.815116  | 1.692178  | 0.644416  |
| H | 6.515489  | 2.239124  | 1.531396  |
| C | 8.042390  | 1.925990  | 0.045356  |
| H | 8.714712  | 2.673620  | 0.451416  |
| C | 7.539029  | 0.241867  | -1.610872 |
| C | 2.548809  | -0.663149 | 1.056083  |
| H | 2.687615  | -0.446606 | 2.113021  |
| C | -4.119044 | 1.265604  | -2.434640 |
| H | -4.039367 | 1.180582  | -3.509001 |
| C | -2.732157 | 1.163688  | -0.446592 |
| C | -1.502592 | 1.491598  | 0.229335  |
| C | -1.589349 | 0.893075  | 1.504831  |
| C | -3.541464 | 0.325565  | 0.432552  |
| C | 1.278408  | -1.319358 | 0.730128  |
| C | 0.691145  | -2.141660 | 1.702536  |
| C | 1.206955  | -2.308136 | 2.643144  |
| C | -0.541550 | -2.740132 | 1.491445  |
| H | -0.985221 | -3.373449 | 2.250615  |
| C | -1.208603 | -2.499977 | 0.294428  |
| C | -0.663988 | -1.677512 | -0.681937 |
| H | -1.209208 | -1.475936 | -1.596388 |
| C | 0.573761  | -1.086199 | -0.456767 |
| H | 0.954293  | -0.387267 | -1.191886 |

|    |           |           |           |
|----|-----------|-----------|-----------|
| C  | -5.462956 | 1.373360  | -1.860197 |
| C  | -6.742458 | 2.189645  | -0.056664 |
| C  | 0.657775  | 2.348725  | 0.818694  |
| H  | 1.550191  | 2.909835  | 0.562385  |
| C  | -0.374364 | 2.233909  | -0.111452 |
| H  | -0.294892 | 2.718924  | -1.079886 |
| C  | 8.406240  | 1.188886  | -1.081550 |
| H  | 9.365210  | 1.360340  | -1.559335 |
| H  | 7.818692  | -0.316166 | -2.498539 |
| C  | 0.553483  | 1.756448  | 2.078665  |
| C  | -0.577795 | 1.023947  | 2.441940  |
| H  | -0.656506 | 0.557785  | 3.417985  |
| H  | 1.369591  | 1.860295  | 2.786120  |
| H  | -3.067731 | -0.397398 | 2.350151  |
| C  | -6.462828 | 2.828688  | 1.285175  |
| H  | -7.465117 | 2.766854  | -0.641055 |
| H  | -7.121337 | 1.171044  | 0.052458  |
| H  | -6.064740 | 3.839226  | 1.162678  |
| H  | -7.388352 | 2.890279  | 1.863227  |
| H  | -5.740251 | 2.231719  | 1.847178  |
| Br | -2.911369 | -3.278404 | 0.008976  |
| H  | -2.157436 | 1.502971  | -2.328441 |

Zero-point correction= 0.458306 (Hartree/Particle)

Electronic energy = -4460.245343

Internal energy = -4460.201869

Enthalpy= -4460.200745

Gibbs energy = -4460.334528
